# Supplementary material
Source: MDPI journal article supplement (https://www.mdpi.com/2072-4292/11/16/1932)
Supplement: s1 [file s1]

Supplementary materials for

*Influence of soil background on spectral reflectance of winter  
wheat crop canopy*

E.Yu. Prudnikova , I.Yu. Savin, G.V. Vindeker, P.G. Grubina, E.A.  
Shishkonakova, D.V. Sharychev

**Table S1.** Spectral reflectance of winter wheat crop canopy in Red, Red Edge and NIR regions of spectrum

| Soil<br>type <sup>1</sup> | Stage of winter<br>wheat<br>development | Red  |      |      | NIR  |      |      | RedEdge |
|---------------------------|-----------------------------------------|------|------|------|------|------|------|---------|
|                           |                                         | max  | min  | av   | max  | min  | av   |         |
| 1                         | tillering                               | 0.11 | 0.09 | 0.10 | 0.43 | 0.39 | 0.41 | 0.29    |
| 1                         | tillering                               | 0.04 | 0.04 | 0.04 | 0.23 | 0.21 | 0.22 | 0.15    |
| 1                         | tillering                               | 0.06 | 0.05 | 0.05 | 0.28 | 0.24 | 0.26 | 0.18    |
| 1                         | tillering                               | 0.13 | 0.11 | 0.11 | 0.41 | 0.36 | 0.38 | 0.28    |
| 1                         | tillering                               | 0.08 | 0.07 | 0.07 | 0.30 | 0.26 | 0.28 | 0.20    |
| 1                         | tillering                               | 0.09 | 0.07 | 0.08 | 0.33 | 0.29 | 0.32 | 0.22    |
| 1                         | tillering                               | 0.08 | 0.06 | 0.07 | 0.27 | 0.23 | 0.25 | 0.18    |
| 1                         | tillering                               | 0.12 | 0.10 | 0.11 | 0.39 | 0.34 | 0.36 | 0.26    |
| 1                         | tillering                               | 0.08 | 0.07 | 0.08 | 0.28 | 0.24 | 0.26 | 0.19    |
| 1                         | tillering                               | 0.11 | 0.09 | 0.09 | 0.45 | 0.40 | 0.43 | 0.29    |
| 1                         | tillering                               | 0.10 | 0.09 | 0.09 | 0.29 | 0.26 | 0.28 | 0.21    |
| 1                         | tillering                               | 0.12 | 0.10 | 0.10 | 0.33 | 0.28 | 0.30 | 0.23    |
| 1                         | tillering                               | 0.08 | 0.07 | 0.07 | 0.31 | 0.27 | 0.29 | 0.20    |
| 1                         | tillering                               | 0.10 | 0.09 | 0.09 | 0.36 | 0.32 | 0.34 | 0.24    |
| 2                         | tillering                               | 0.11 | 0.10 | 0.10 | 0.50 | 0.46 | 0.48 | 0.31    |
| 2                         | tillering                               | 0.12 | 0.11 | 0.11 | 0.48 | 0.44 | 0.46 | 0.31    |
| 2                         | tillering                               | 0.16 | 0.14 | 0.15 | 0.45 | 0.41 | 0.43 | 0.32    |
| 2                         | tillering                               | 0.09 | 0.07 | 0.08 | 0.48 | 0.44 | 0.46 | 0.29    |
| 2                         | tillering                               | 0.10 | 0.08 | 0.09 | 0.55 | 0.51 | 0.53 | 0.33    |
| 2                         | tillering                               | 0.07 | 0.05 | 0.06 | 0.41 | 0.37 | 0.39 | 0.24    |
| 2                         | tillering                               | 0.05 | 0.04 | 0.04 | 0.28 | 0.25 | 0.27 | 0.16    |
| 2                         | tillering                               | 0.11 | 0.10 | 0.10 | 0.41 | 0.37 | 0.39 | 0.27    |
| 3                         | tillering                               | 0.09 | 0.08 | 0.08 | 0.23 | 0.19 | 0.21 | 0.15    |
| 3                         | tillering                               | 0.06 | 0.05 | 0.05 | 0.21 | 0.18 | 0.20 | 0.14    |
| 3                         | tillering                               | 0.05 | 0.04 | 0.04 | 0.13 | 0.11 | 0.12 | 0.09    |
| 3                         | tillering                               | 0.06 | 0.05 | 0.06 | 0.15 | 0.12 | 0.14 | 0.10    |
| 3                         | tillering                               | 0.05 | 0.04 | 0.05 | 0.16 | 0.14 | 0.15 | 0.11    |
| 3                         | tillering                               | 0.06 | 0.05 | 0.05 | 0.18 | 0.15 | 0.17 | 0.12    |
| 3                         | tillering                               | 0.05 | 0.05 | 0.05 | 0.16 | 0.13 | 0.14 | 0.10    |
| 3                         | tillering                               | 0.05 | 0.04 | 0.05 | 0.19 | 0.16 | 0.18 | 0.12    |
| 3                         | tillering                               | 0.05 | 0.04 | 0.04 | 0.19 | 0.16 | 0.18 | 0.12    |
| 3                         | tillering                               | 0.06 | 0.05 | 0.06 | 0.15 | 0.12 | 0.14 | 0.10    |
| 3                         | tillering                               | 0.04 | 0.04 | 0.04 | 0.18 | 0.15 | 0.17 | 0.11    |

|   |                |      |      |      |      |      |      |      |
|---|----------------|------|------|------|------|------|------|------|
| 3 | tillering      | 0.08 | 0.07 | 0.07 | 0.21 | 0.17 | 0.19 | 0.14 |
| 1 | shooting       | 0.05 | 0.03 | 0.04 | 0.69 | 0.67 | 0.68 | 0.32 |
| 1 | shooting       | 0.04 | 0.02 | 0.03 | 0.57 | 0.54 | 0.56 | 0.27 |
| 1 | shooting       | 0.05 | 0.03 | 0.04 | 0.40 | 0.38 | 0.39 | 0.24 |
| 1 | shooting       | 0.06 | 0.04 | 0.05 | 0.58 | 0.57 | 0.58 | 0.35 |
| 1 | shooting       | 0.04 | 0.02 | 0.03 | 0.54 | 0.51 | 0.53 | 0.24 |
| 1 | shooting       | 0.04 | 0.02 | 0.03 | 0.46 | 0.45 | 0.46 | 0.23 |
| 1 | shooting       | 0.03 | 0.02 | 0.03 | 0.50 | 0.48 | 0.49 | 0.23 |
| 1 | shooting       | 0.04 | 0.02 | 0.03 | 0.50 | 0.48 | 0.49 | 0.26 |
| 1 | shooting       | 0.04 | 0.03 | 0.03 | 0.47 | 0.45 | 0.46 | 0.27 |
| 1 | shooting       | 0.04 | 0.02 | 0.03 | 0.58 | 0.56 | 0.57 | 0.28 |
| 2 | shooting       | 0.03 | 0.02 | 0.02 | 0.50 | 0.48 | 0.49 | 0.21 |
| 2 | shooting       | 0.03 | 0.02 | 0.02 | 0.58 | 0.56 | 0.58 | 0.23 |
| 2 | shooting       | 0.03 | 0.02 | 0.02 | 0.55 | 0.53 | 0.55 | 0.23 |
| 2 | shooting       | 0.03 | 0.02 | 0.02 | 0.58 | 0.56 | 0.58 | 0.24 |
| 2 | shooting       | 0.03 | 0.02 | 0.02 | 0.53 | 0.50 | 0.52 | 0.21 |
| 3 | shooting       | 0.03 | 0.02 | 0.02 | 0.41 | 0.40 | 0.41 | 0.19 |
| 3 | shooting       | 0.03 | 0.02 | 0.02 | 0.40 | 0.39 | 0.39 | 0.18 |
| 3 | shooting       | 0.03 | 0.03 | 0.03 | 0.37 | 0.36 | 0.37 | 0.19 |
| 3 | shooting       | 0.03 | 0.02 | 0.02 | 0.39 | 0.38 | 0.39 | 0.17 |
| 3 | shooting       | 0.03 | 0.03 | 0.03 | 0.32 | 0.31 | 0.32 | 0.17 |
| 3 | shooting       | 0.03 | 0.02 | 0.02 | 0.38 | 0.36 | 0.37 | 0.17 |
| 3 | shooting       | 0.03 | 0.02 | 0.02 | 0.33 | 0.32 | 0.33 | 0.17 |
| 3 | shooting       | 0.03 | 0.02 | 0.02 | 0.44 | 0.42 | 0.43 | 0.19 |
| 3 | shooting       | 0.02 | 0.02 | 0.02 | 0.45 | 0.43 | 0.44 | 0.18 |
| 3 | shooting       | 0.02 | 0.02 | 0.02 | 0.36 | 0.35 | 0.36 | 0.16 |
| 3 | shooting       | 0.03 | 0.02 | 0.02 | 0.29 | 0.28 | 0.29 | 0.14 |
| 3 | shooting       | 0.02 | 0.01 | 0.02 | 0.41 | 0.38 | 0.40 | 0.16 |
| 3 | shooting       | 0.02 | 0.01 | 0.02 | 0.30 | 0.28 | 0.30 | 0.14 |
| 1 | milky ripeness | 0.07 | 0.05 | 0.06 | 0.23 | 0.19 | 0.22 | 0.15 |
| 1 | milky ripeness | 0.06 | 0.05 | 0.05 | 0.31 | 0.26 | 0.29 | 0.19 |
| 1 | milky ripeness | 0.07 | 0.05 | 0.06 | 0.29 | 0.24 | 0.27 | 0.18 |
| 1 | milky ripeness | 0.08 | 0.07 | 0.07 | 0.30 | 0.24 | 0.28 | 0.19 |
| 1 | milky ripeness | 0.08 | 0.06 | 0.07 | 0.30 | 0.24 | 0.28 | 0.18 |
| 1 | milky ripeness | 0.08 | 0.06 | 0.07 | 0.27 | 0.21 | 0.25 | 0.17 |
| 1 | milky ripeness | 0.08 | 0.07 | 0.07 | 0.26 | 0.21 | 0.24 | 0.17 |
| 1 | milky ripeness | 0.12 | 0.10 | 0.10 | 0.31 | 0.24 | 0.28 | 0.21 |
| 1 | milky ripeness | 0.08 | 0.06 | 0.07 | 0.34 | 0.28 | 0.32 | 0.21 |

---

|   |                |      |      |      |      |      |      |      |
|---|----------------|------|------|------|------|------|------|------|
| 1 | milky ripeness | 0.09 | 0.07 | 0.08 | 0.34 | 0.28 | 0.32 | 0.22 |
| 2 | milky ripeness | 0.13 | 0.10 | 0.10 | 0.41 | 0.35 | 0.38 | 0.28 |
| 2 | milky ripeness | 0.04 | 0.03 | 0.03 | 0.38 | 0.32 | 0.36 | 0.18 |
| 2 | milky ripeness | 0.06 | 0.05 | 0.05 | 0.40 | 0.33 | 0.37 | 0.21 |
| 2 | milky ripeness | 0.07 | 0.04 | 0.05 | 0.47 | 0.42 | 0.45 | 0.27 |
| 3 | milky ripeness | 0.04 | 0.03 | 0.03 | 0.43 | 0.37 | 0.41 | 0.18 |
| 3 | milky ripeness | 0.08 | 0.06 | 0.07 | 0.39 | 0.33 | 0.37 | 0.22 |
| 3 | milky ripeness | 0.06 | 0.05 | 0.06 | 0.46 | 0.39 | 0.44 | 0.22 |
| 3 | milky ripeness | 0.10 | 0.08 | 0.09 | 0.38 | 0.32 | 0.35 | 0.24 |
| 3 | milky ripeness | 0.05 | 0.04 | 0.04 | 0.36 | 0.30 | 0.33 | 0.17 |
| 3 | milky ripeness | 0.06 | 0.05 | 0.05 | 0.38 | 0.32 | 0.36 | 0.19 |
| 3 | milky ripeness | 0.06 | 0.05 | 0.05 | 0.35 | 0.29 | 0.33 | 0.18 |
| 3 | milky ripeness | 0.05 | 0.04 | 0.04 | 0.37 | 0.32 | 0.35 | 0.17 |
| 3 | milky ripeness | 0.04 | 0.03 | 0.04 | 0.35 | 0.29 | 0.33 | 0.16 |

---

<sup>1</sup>Soil types are given as following: 1 – grey forest soil, 2 – alluvial soil, 3 – chernozem.

**Table S2.** NDVI values for winter wheat crop canopy

| Soil type <sup>1</sup> | Stage of winter wheat development | Calculated combinations<br>(more details on the meaning of combinations are provided in <b>Table 2</b> of original manuscript) |      |      |        |        |       |       |       |       |       |       |      |
|------------------------|-----------------------------------|--------------------------------------------------------------------------------------------------------------------------------|------|------|--------|--------|-------|-------|-------|-------|-------|-------|------|
|                        |                                   | max                                                                                                                            | min  | av   | maxmin | minmax | avmax | avmin | maxav | minav | edmax | edmin | edav |
| 1                      | tillering                         | 0.59                                                                                                                           | 0.62 | 0.62 | 0.65   | 0.56   | 0.58  | 0.63  | 0.63  | 0.60  | 0.20  | 0.15  | 0.18 |
| 1                      | tillering                         | 0.67                                                                                                                           | 0.70 | 0.69 | 0.73   | 0.64   | 0.66  | 0.72  | 0.70  | 0.67  | 0.22  | 0.17  | 0.20 |
| 1                      | tillering                         | 0.64                                                                                                                           | 0.66 | 0.66 | 0.70   | 0.60   | 0.62  | 0.68  | 0.68  | 0.64  | 0.22  | 0.16  | 0.19 |
| 1                      | tillering                         | 0.52                                                                                                                           | 0.54 | 0.54 | 0.58   | 0.48   | 0.50  | 0.56  | 0.56  | 0.52  | 0.17  | 0.11  | 0.15 |
| 1                      | tillering                         | 0.58                                                                                                                           | 0.59 | 0.60 | 0.63   | 0.54   | 0.56  | 0.62  | 0.62  | 0.57  | 0.21  | 0.15  | 0.18 |
| 1                      | tillering                         | 0.59                                                                                                                           | 0.60 | 0.60 | 0.64   | 0.54   | 0.57  | 0.62  | 0.62  | 0.58  | 0.21  | 0.15  | 0.18 |
| 1                      | tillering                         | 0.56                                                                                                                           | 0.57 | 0.57 | 0.61   | 0.51   | 0.54  | 0.59  | 0.59  | 0.55  | 0.20  | 0.14  | 0.17 |
| 1                      | tillering                         | 0.53                                                                                                                           | 0.54 | 0.55 | 0.58   | 0.48   | 0.51  | 0.56  | 0.57  | 0.53  | 0.19  | 0.13  | 0.16 |
| 1                      | tillering                         | 0.54                                                                                                                           | 0.54 | 0.55 | 0.59   | 0.49   | 0.52  | 0.57  | 0.58  | 0.53  | 0.20  | 0.12  | 0.16 |
| 1                      | tillering                         | 0.61                                                                                                                           | 0.64 | 0.64 | 0.67   | 0.58   | 0.60  | 0.66  | 0.65  | 0.62  | 0.21  | 0.16  | 0.19 |
| 1                      | tillering                         | 0.49                                                                                                                           | 0.49 | 0.51 | 0.54   | 0.43   | 0.46  | 0.52  | 0.53  | 0.48  | 0.18  | 0.11  | 0.14 |
| 1                      | tillering                         | 0.47                                                                                                                           | 0.47 | 0.49 | 0.52   | 0.41   | 0.44  | 0.50  | 0.51  | 0.46  | 0.18  | 0.10  | 0.14 |
| 1                      | tillering                         | 0.59                                                                                                                           | 0.61 | 0.61 | 0.65   | 0.55   | 0.57  | 0.63  | 0.63  | 0.59  | 0.21  | 0.14  | 0.18 |
| 1                      | tillering                         | 0.55                                                                                                                           | 0.56 | 0.57 | 0.60   | 0.51   | 0.54  | 0.59  | 0.59  | 0.55  | 0.19  | 0.14  | 0.17 |
| 2                      | tillering                         | 0.63                                                                                                                           | 0.65 | 0.65 | 0.68   | 0.61   | 0.62  | 0.66  | 0.66  | 0.64  | 0.24  | 0.19  | 0.22 |
| 2                      | tillering                         | 0.59                                                                                                                           | 0.61 | 0.61 | 0.64   | 0.56   | 0.58  | 0.63  | 0.63  | 0.60  | 0.22  | 0.18  | 0.20 |
| 2                      | tillering                         | 0.47                                                                                                                           | 0.49 | 0.49 | 0.52   | 0.43   | 0.45  | 0.50  | 0.51  | 0.47  | 0.17  | 0.12  | 0.15 |
| 2                      | tillering                         | 0.69                                                                                                                           | 0.72 | 0.71 | 0.74   | 0.67   | 0.68  | 0.73  | 0.72  | 0.70  | 0.25  | 0.22  | 0.24 |
| 2                      | tillering                         | 0.70                                                                                                                           | 0.73 | 0.72 | 0.75   | 0.68   | 0.69  | 0.74  | 0.73  | 0.71  | 0.25  | 0.21  | 0.23 |
| 2                      | tillering                         | 0.71                                                                                                                           | 0.74 | 0.73 | 0.76   | 0.69   | 0.70  | 0.75  | 0.74  | 0.72  | 0.25  | 0.21  | 0.23 |
| 2                      | tillering                         | 0.71                                                                                                                           | 0.73 | 0.72 | 0.75   | 0.68   | 0.70  | 0.74  | 0.73  | 0.71  | 0.26  | 0.21  | 0.24 |
| 2                      | tillering                         | 0.57                                                                                                                           | 0.58 | 0.58 | 0.61   | 0.53   | 0.55  | 0.60  | 0.60  | 0.57  | 0.21  | 0.16  | 0.19 |
| 3                      | tillering                         | 0.43                                                                                                                           | 0.42 | 0.44 | 0.49   | 0.35   | 0.39  | 0.46  | 0.47  | 0.40  | 0.20  | 0.11  | 0.16 |
| 3                      | tillering                         | 0.54                                                                                                                           | 0.55 | 0.56 | 0.59   | 0.50   | 0.52  | 0.57  | 0.58  | 0.54  | 0.20  | 0.14  | 0.18 |
| 3                      | tillering                         | 0.44                                                                                                                           | 0.42 | 0.44 | 0.49   | 0.36   | 0.40  | 0.45  | 0.48  | 0.41  | 0.19  | 0.11  | 0.15 |
| 3                      | tillering                         | 0.41                                                                                                                           | 0.38 | 0.42 | 0.47   | 0.33   | 0.37  | 0.43  | 0.46  | 0.37  | 0.19  | 0.09  | 0.15 |
| 3                      | tillering                         | 0.53                                                                                                                           | 0.53 | 0.54 | 0.58   | 0.47   | 0.51  | 0.56  | 0.57  | 0.51  | 0.20  | 0.12  | 0.17 |
| 3                      | tillering                         | 0.52                                                                                                                           | 0.51 | 0.53 | 0.57   | 0.45   | 0.49  | 0.55  | 0.56  | 0.49  | 0.21  | 0.12  | 0.17 |
| 3                      | tillering                         | 0.48                                                                                                                           | 0.45 | 0.49 | 0.53   | 0.40   | 0.45  | 0.50  | 0.52  | 0.44  | 0.21  | 0.11  | 0.17 |
| 3                      | tillering                         | 0.57                                                                                                                           | 0.56 | 0.58 | 0.62   | 0.50   | 0.54  | 0.60  | 0.61  | 0.54  | 0.23  | 0.13  | 0.19 |
| 3                      | tillering                         | 0.61                                                                                                                           | 0.60 | 0.62 | 0.66   | 0.55   | 0.59  | 0.64  | 0.64  | 0.58  | 0.23  | 0.14  | 0.20 |
| 3                      | tillering                         | 0.42                                                                                                                           | 0.36 | 0.42 | 0.47   | 0.31   | 0.38  | 0.43  | 0.46  | 0.35  | 0.21  | 0.07  | 0.15 |
| 3                      | tillering                         | 0.60                                                                                                                           | 0.60 | 0.62 | 0.66   | 0.54   | 0.58  | 0.64  | 0.64  | 0.57  | 0.23  | 0.13  | 0.20 |
| 3                      | tillering                         | 0.46                                                                                                                           | 0.45 | 0.47 | 0.52   | 0.39   | 0.43  | 0.49  | 0.51  | 0.43  | 0.20  | 0.11  | 0.15 |
| 1                      | shooting                          | 0.87                                                                                                                           | 0.91 | 0.89 | 0.91   | 0.87   | 0.87  | 0.91  | 0.89  | 0.89  | 0.37  | 0.35  | 0.36 |
| 1                      | shooting                          | 0.88                                                                                                                           | 0.92 | 0.90 | 0.93   | 0.87   | 0.88  | 0.92  | 0.90  | 0.90  | 0.36  | 0.34  | 0.36 |
| 1                      | shooting                          | 0.79                                                                                                                           | 0.85 | 0.82 | 0.86   | 0.78   | 0.78  | 0.86  | 0.82  | 0.82  | 0.24  | 0.22  | 0.23 |
| 1                      | shooting                          | 0.80                                                                                                                           | 0.87 | 0.84 | 0.87   | 0.80   | 0.80  | 0.87  | 0.84  | 0.83  | 0.25  | 0.24  | 0.25 |
| 1                      | shooting                          | 0.88                                                                                                                           | 0.92 | 0.90 | 0.92   | 0.87   | 0.88  | 0.92  | 0.90  | 0.90  | 0.38  | 0.36  | 0.37 |

|   |                |      |      |      |      |      |      |      |      |      |      |      |      |
|---|----------------|------|------|------|------|------|------|------|------|------|------|------|------|
| 1 | shooting       | 0.86 | 0.90 | 0.88 | 0.91 | 0.85 | 0.85 | 0.91 | 0.89 | 0.88 | 0.33 | 0.32 | 0.33 |
| 1 | shooting       | 0.87 | 0.91 | 0.89 | 0.91 | 0.86 | 0.87 | 0.91 | 0.89 | 0.89 | 0.37 | 0.35 | 0.36 |
| 1 | shooting       | 0.85 | 0.91 | 0.88 | 0.91 | 0.84 | 0.85 | 0.91 | 0.88 | 0.88 | 0.31 | 0.30 | 0.31 |
| 1 | shooting       | 0.83 | 0.89 | 0.86 | 0.90 | 0.82 | 0.82 | 0.89 | 0.86 | 0.86 | 0.28 | 0.25 | 0.27 |
| 1 | shooting       | 0.87 | 0.92 | 0.89 | 0.92 | 0.86 | 0.86 | 0.92 | 0.89 | 0.89 | 0.35 | 0.34 | 0.35 |
| 2 | shooting       | 0.89 | 0.93 | 0.91 | 0.93 | 0.89 | 0.89 | 0.93 | 0.91 | 0.91 | 0.41 | 0.39 | 0.40 |
| 2 | shooting       | 0.90 | 0.93 | 0.92 | 0.94 | 0.90 | 0.90 | 0.94 | 0.92 | 0.92 | 0.43 | 0.41 | 0.43 |
| 2 | shooting       | 0.90 | 0.93 | 0.92 | 0.93 | 0.89 | 0.90 | 0.93 | 0.92 | 0.91 | 0.41 | 0.39 | 0.41 |
| 2 | shooting       | 0.90 | 0.94 | 0.92 | 0.94 | 0.89 | 0.90 | 0.94 | 0.92 | 0.92 | 0.42 | 0.40 | 0.41 |
| 2 | shooting       | 0.90 | 0.94 | 0.92 | 0.94 | 0.90 | 0.90 | 0.94 | 0.92 | 0.92 | 0.44 | 0.41 | 0.43 |
| 3 | shooting       | 0.87 | 0.90 | 0.89 | 0.91 | 0.87 | 0.87 | 0.91 | 0.89 | 0.89 | 0.37 | 0.35 | 0.36 |
| 3 | shooting       | 0.87 | 0.91 | 0.89 | 0.91 | 0.87 | 0.87 | 0.91 | 0.89 | 0.89 | 0.37 | 0.36 | 0.37 |
| 3 | shooting       | 0.83 | 0.87 | 0.85 | 0.87 | 0.83 | 0.83 | 0.87 | 0.85 | 0.85 | 0.34 | 0.32 | 0.33 |
| 3 | shooting       | 0.88 | 0.91 | 0.89 | 0.91 | 0.87 | 0.88 | 0.91 | 0.90 | 0.89 | 0.39 | 0.38 | 0.39 |
| 3 | shooting       | 0.81 | 0.84 | 0.82 | 0.85 | 0.80 | 0.80 | 0.84 | 0.83 | 0.82 | 0.31 | 0.29 | 0.30 |
| 3 | shooting       | 0.87 | 0.90 | 0.89 | 0.90 | 0.87 | 0.87 | 0.90 | 0.89 | 0.89 | 0.38 | 0.37 | 0.38 |
| 3 | shooting       | 0.84 | 0.88 | 0.86 | 0.88 | 0.83 | 0.84 | 0.88 | 0.86 | 0.85 | 0.33 | 0.32 | 0.33 |
| 3 | shooting       | 0.89 | 0.92 | 0.91 | 0.93 | 0.89 | 0.89 | 0.93 | 0.91 | 0.91 | 0.41 | 0.39 | 0.40 |
| 3 | shooting       | 0.90 | 0.93 | 0.92 | 0.93 | 0.90 | 0.90 | 0.93 | 0.92 | 0.92 | 0.43 | 0.41 | 0.43 |
| 3 | shooting       | 0.87 | 0.91 | 0.89 | 0.91 | 0.87 | 0.87 | 0.91 | 0.90 | 0.89 | 0.38 | 0.36 | 0.37 |
| 3 | shooting       | 0.84 | 0.87 | 0.86 | 0.88 | 0.83 | 0.84 | 0.88 | 0.86 | 0.85 | 0.34 | 0.32 | 0.34 |
| 3 | shooting       | 0.90 | 0.93 | 0.91 | 0.93 | 0.89 | 0.90 | 0.93 | 0.92 | 0.91 | 0.43 | 0.40 | 0.42 |
| 3 | shooting       | 0.87 | 0.91 | 0.89 | 0.91 | 0.86 | 0.87 | 0.91 | 0.89 | 0.89 | 0.38 | 0.35 | 0.37 |
| 1 | milky ripeness | 0.56 | 0.56 | 0.58 | 0.63 | 0.48 | 0.53 | 0.60 | 0.60 | 0.53 | 0.23 | 0.12 | 0.19 |
| 1 | milky ripeness | 0.66 | 0.69 | 0.68 | 0.74 | 0.61 | 0.64 | 0.72 | 0.70 | 0.66 | 0.24 | 0.16 | 0.21 |
| 1 | milky ripeness | 0.63 | 0.65 | 0.65 | 0.70 | 0.57 | 0.61 | 0.68 | 0.67 | 0.61 | 0.23 | 0.13 | 0.19 |
| 1 | milky ripeness | 0.57 | 0.57 | 0.59 | 0.64 | 0.50 | 0.54 | 0.61 | 0.61 | 0.54 | 0.23 | 0.13 | 0.19 |
| 1 | milky ripeness | 0.59 | 0.59 | 0.60 | 0.66 | 0.51 | 0.56 | 0.64 | 0.63 | 0.56 | 0.24 | 0.13 | 0.20 |
| 1 | milky ripeness | 0.55 | 0.55 | 0.57 | 0.62 | 0.46 | 0.51 | 0.59 | 0.59 | 0.52 | 0.23 | 0.12 | 0.19 |
| 1 | milky ripeness | 0.51 | 0.50 | 0.53 | 0.58 | 0.42 | 0.47 | 0.55 | 0.56 | 0.48 | 0.21 | 0.10 | 0.16 |
| 1 | milky ripeness | 0.44 | 0.42 | 0.45 | 0.51 | 0.33 | 0.39 | 0.47 | 0.49 | 0.39 | 0.20 | 0.07 | 0.14 |
| 1 | milky ripeness | 0.62 | 0.64 | 0.64 | 0.69 | 0.56 | 0.60 | 0.67 | 0.66 | 0.60 | 0.24 | 0.15 | 0.21 |
| 1 | milky ripeness | 0.58 | 0.59 | 0.60 | 0.65 | 0.50 | 0.55 | 0.63 | 0.62 | 0.55 | 0.23 | 0.13 | 0.19 |
| 2 | milky ripeness | 0.52 | 0.57 | 0.57 | 0.62 | 0.46 | 0.50 | 0.60 | 0.60 | 0.54 | 0.19 | 0.11 | 0.16 |
| 2 | milky ripeness | 0.81 | 0.85 | 0.83 | 0.87 | 0.78 | 0.80 | 0.86 | 0.84 | 0.81 | 0.37 | 0.30 | 0.35 |
| 2 | milky ripeness | 0.73 | 0.76 | 0.75 | 0.80 | 0.68 | 0.72 | 0.78 | 0.76 | 0.72 | 0.31 | 0.22 | 0.28 |
| 2 | milky ripeness | 0.75 | 0.82 | 0.79 | 0.84 | 0.72 | 0.74 | 0.83 | 0.80 | 0.77 | 0.27 | 0.21 | 0.24 |
| 3 | milky          | 0.84 | 0.86 | 0.86 | 0.88 | 0.82 | 0.84 | 0.88 | 0.86 | 0.84 | 0.42 | 0.36 | 0.40 |

---

|   |          |      |      |      |      |      |      |      |      |      |      |      |      |
|---|----------|------|------|------|------|------|------|------|------|------|------|------|------|
|   | ripeness |      |      |      |      |      |      |      |      |      |      |      |      |
| 3 | milky    | 0.67 | 0.68 | 0.68 | 0.72 | 0.62 | 0.65 | 0.71 | 0.70 | 0.65 | 0.28 | 0.20 | 0.25 |
|   | ripeness |      |      |      |      |      |      |      |      |      |      |      |      |
| 3 | milky    | 0.76 | 0.77 | 0.77 | 0.80 | 0.71 | 0.74 | 0.79 | 0.78 | 0.74 | 0.36 | 0.27 | 0.33 |
|   | ripeness |      |      |      |      |      |      |      |      |      |      |      |      |
| 3 | milky    | 0.59 | 0.60 | 0.60 | 0.65 | 0.53 | 0.57 | 0.63 | 0.62 | 0.57 | 0.23 | 0.15 | 0.19 |
|   | ripeness |      |      |      |      |      |      |      |      |      |      |      |      |
| 3 | milky    | 0.76 | 0.77 | 0.77 | 0.80 | 0.71 | 0.74 | 0.79 | 0.78 | 0.74 | 0.35 | 0.27 | 0.32 |
|   | ripeness |      |      |      |      |      |      |      |      |      |      |      |      |
| 3 | milky    | 0.75 | 0.75 | 0.76 | 0.79 | 0.70 | 0.73 | 0.78 | 0.77 | 0.73 | 0.34 | 0.25 | 0.31 |
|   | ripeness |      |      |      |      |      |      |      |      |      |      |      |      |
| 3 | milky    | 0.73 | 0.73 | 0.73 | 0.77 | 0.68 | 0.71 | 0.76 | 0.75 | 0.71 | 0.33 | 0.24 | 0.30 |
|   | ripeness |      |      |      |      |      |      |      |      |      |      |      |      |
| 3 | milky    | 0.77 | 0.78 | 0.78 | 0.81 | 0.74 | 0.76 | 0.80 | 0.79 | 0.76 | 0.37 | 0.30 | 0.35 |
|   | ripeness |      |      |      |      |      |      |      |      |      |      |      |      |
| 3 | milky    | 0.78 | 0.80 | 0.79 | 0.82 | 0.75 | 0.77 | 0.82 | 0.80 | 0.77 | 0.37 | 0.29 | 0.34 |
|   | ripeness |      |      |      |      |      |      |      |      |      |      |      |      |

---

<sup>1</sup> Soil types are given as following: 1 – grey forest soil, 2 – alluvial soil, 3 – chernozem.

**Table S3.** EVI2 values for winter wheat crop canopy

| Soil type <sup>1</sup> | Stage of winter wheat development | Calculated combinations<br>(more details on the meaning of combinations are provided in <b>Table 2</b> of original manuscript) |      |      |        |        |       |       |       |       |       |       |      |
|------------------------|-----------------------------------|--------------------------------------------------------------------------------------------------------------------------------|------|------|--------|--------|-------|-------|-------|-------|-------|-------|------|
|                        |                                   | max                                                                                                                            | min  | av   | maxmin | minmax | avmax | avmin | maxav | minav | edmax | edmin | edav |
| 1                      | tillering                         | 0.48                                                                                                                           | 0.47 | 0.48 | 0.51   | 0.43   | 0.46  | 0.49  | 0.50  | 0.45  | 0.17  | 0.12  | 0.15 |
| 1                      | tillering                         | 0.35                                                                                                                           | 0.33 | 0.34 | 0.37   | 0.31   | 0.33  | 0.35  | 0.36  | 0.32  | 0.13  | 0.10  | 0.12 |
| 1                      | tillering                         | 0.38                                                                                                                           | 0.36 | 0.37 | 0.41   | 0.33   | 0.36  | 0.38  | 0.40  | 0.35  | 0.15  | 0.10  | 0.13 |
| 1                      | tillering                         | 0.41                                                                                                                           | 0.39 | 0.41 | 0.45   | 0.35   | 0.38  | 0.42  | 0.43  | 0.37  | 0.14  | 0.09  | 0.12 |
| 1                      | tillering                         | 0.37                                                                                                                           | 0.34 | 0.37 | 0.40   | 0.32   | 0.35  | 0.37  | 0.39  | 0.34  | 0.15  | 0.10  | 0.13 |
| 1                      | tillering                         | 0.40                                                                                                                           | 0.37 | 0.40 | 0.43   | 0.35   | 0.38  | 0.40  | 0.42  | 0.36  | 0.16  | 0.10  | 0.13 |
| 1                      | tillering                         | 0.33                                                                                                                           | 0.31 | 0.32 | 0.36   | 0.28   | 0.31  | 0.33  | 0.35  | 0.30  | 0.13  | 0.08  | 0.11 |
| 1                      | tillering                         | 0.41                                                                                                                           | 0.38 | 0.40 | 0.44   | 0.35   | 0.38  | 0.41  | 0.43  | 0.37  | 0.16  | 0.10  | 0.13 |
| 1                      | tillering                         | 0.34                                                                                                                           | 0.30 | 0.33 | 0.36   | 0.28   | 0.31  | 0.33  | 0.35  | 0.30  | 0.13  | 0.08  | 0.11 |
| 1                      | tillering                         | 0.50                                                                                                                           | 0.49 | 0.50 | 0.54   | 0.45   | 0.48  | 0.52  | 0.52  | 0.48  | 0.18  | 0.13  | 0.16 |
| 1                      | tillering                         | 0.32                                                                                                                           | 0.29 | 0.31 | 0.35   | 0.26   | 0.29  | 0.32  | 0.34  | 0.28  | 0.12  | 0.07  | 0.10 |
| 1                      | tillering                         | 0.33                                                                                                                           | 0.29 | 0.32 | 0.36   | 0.27   | 0.30  | 0.33  | 0.35  | 0.29  | 0.13  | 0.07  | 0.10 |
| 1                      | tillering                         | 0.39                                                                                                                           | 0.36 | 0.38 | 0.41   | 0.33   | 0.36  | 0.39  | 0.40  | 0.35  | 0.15  | 0.10  | 0.12 |
| 1                      | tillering                         | 0.40                                                                                                                           | 0.37 | 0.39 | 0.43   | 0.35   | 0.38  | 0.41  | 0.42  | 0.36  | 0.15  | 0.10  | 0.13 |
| 2                      | tillering                         | 0.55                                                                                                                           | 0.53 | 0.55 | 0.58   | 0.50   | 0.53  | 0.56  | 0.57  | 0.52  | 0.21  | 0.17  | 0.19 |
| 2                      | tillering                         | 0.51                                                                                                                           | 0.49 | 0.51 | 0.54   | 0.46   | 0.49  | 0.52  | 0.53  | 0.48  | 0.20  | 0.15  | 0.18 |
| 2                      | tillering                         | 0.40                                                                                                                           | 0.38 | 0.40 | 0.43   | 0.35   | 0.37  | 0.41  | 0.42  | 0.37  | 0.15  | 0.10  | 0.13 |
| 2                      | tillering                         | 0.59                                                                                                                           | 0.57 | 0.58 | 0.62   | 0.54   | 0.57  | 0.60  | 0.60  | 0.56  | 0.23  | 0.19  | 0.21 |
| 2                      | tillering                         | 0.65                                                                                                                           | 0.63 | 0.64 | 0.68   | 0.60   | 0.62  | 0.66  | 0.66  | 0.62  | 0.24  | 0.20  | 0.22 |
| 2                      | tillering                         | 0.54                                                                                                                           | 0.53 | 0.54 | 0.57   | 0.50   | 0.52  | 0.55  | 0.56  | 0.52  | 0.20  | 0.17  | 0.18 |
| 2                      | tillering                         | 0.42                                                                                                                           | 0.40 | 0.41 | 0.43   | 0.38   | 0.40  | 0.42  | 0.43  | 0.39  | 0.17  | 0.13  | 0.15 |
| 2                      | tillering                         | 0.45                                                                                                                           | 0.42 | 0.44 | 0.47   | 0.40   | 0.42  | 0.45  | 0.46  | 0.41  | 0.17  | 0.13  | 0.15 |
| 3                      | tillering                         | 0.20                                                                                                                           | 0.20 | 0.21 | 0.23   | 0.18   | 0.19  | 0.22  | 0.22  | 0.20  | 0.08  | 0.06  | 0.07 |
| 3                      | tillering                         | 0.24                                                                                                                           | 0.25 | 0.25 | 0.26   | 0.23   | 0.24  | 0.26  | 0.26  | 0.24  | 0.09  | 0.07  | 0.08 |
| 3                      | tillering                         | 0.13                                                                                                                           | 0.13 | 0.13 | 0.14   | 0.12   | 0.12  | 0.14  | 0.14  | 0.13  | 0.05  | 0.04  | 0.05 |
| 3                      | tillering                         | 0.14                                                                                                                           | 0.14 | 0.14 | 0.15   | 0.12   | 0.13  | 0.15  | 0.15  | 0.13  | 0.06  | 0.04  | 0.05 |
| 3                      | tillering                         | 0.20                                                                                                                           | 0.20 | 0.20 | 0.22   | 0.18   | 0.19  | 0.21  | 0.21  | 0.19  | 0.07  | 0.05  | 0.07 |
| 3                      | tillering                         | 0.20                                                                                                                           | 0.20 | 0.21 | 0.22   | 0.18   | 0.20  | 0.22  | 0.22  | 0.20  | 0.08  | 0.06  | 0.07 |
| 3                      | tillering                         | 0.16                                                                                                                           | 0.16 | 0.17 | 0.18   | 0.14   | 0.16  | 0.17  | 0.18  | 0.16  | 0.07  | 0.05  | 0.06 |
| 3                      | tillering                         | 0.23                                                                                                                           | 0.22 | 0.24 | 0.25   | 0.20   | 0.23  | 0.25  | 0.25  | 0.22  | 0.09  | 0.06  | 0.08 |
| 3                      | tillering                         | 0.25                                                                                                                           | 0.24 | 0.26 | 0.27   | 0.22   | 0.24  | 0.26  | 0.26  | 0.23  | 0.09  | 0.07  | 0.09 |
| 3                      | tillering                         | 0.14                                                                                                                           | 0.13 | 0.14 | 0.16   | 0.11   | 0.13  | 0.15  | 0.15  | 0.12  | 0.06  | 0.03  | 0.05 |
| 3                      | tillering                         | 0.24                                                                                                                           | 0.22 | 0.24 | 0.26   | 0.21   | 0.23  | 0.25  | 0.25  | 0.22  | 0.09  | 0.06  | 0.09 |
| 3                      | tillering                         | 0.19                                                                                                                           | 0.20 | 0.20 | 0.22   | 0.18   | 0.19  | 0.21  | 0.21  | 0.20  | 0.07  | 0.06  | 0.06 |
| 1                      | shooting                          | 0.89                                                                                                                           | 0.91 | 0.90 | 0.93   | 0.87   | 0.88  | 0.92  | 0.91  | 0.89  | 0.37  | 0.36  | 0.37 |
| 1                      | shooting                          | 0.80                                                                                                                           | 0.82 | 0.82 | 0.84   | 0.78   | 0.79  | 0.84  | 0.83  | 0.80  | 0.34  | 0.32  | 0.34 |
| 1                      | shooting                          | 0.58                                                                                                                           | 0.60 | 0.59 | 0.62   | 0.56   | 0.57  | 0.62  | 0.60  | 0.58  | 0.19  | 0.17  | 0.19 |
| 1                      | shooting                          | 0.75                                                                                                                           | 0.79 | 0.77 | 0.81   | 0.73   | 0.74  | 0.80  | 0.78  | 0.76  | 0.24  | 0.23  | 0.24 |
| 1                      | shooting                          | 0.77                                                                                                                           | 0.78 | 0.79 | 0.81   | 0.75   | 0.77  | 0.80  | 0.79  | 0.77  | 0.35  | 0.32  | 0.34 |



|   |                   |      |      |      |      |      |      |      |      |      |      |      |      |
|---|-------------------|------|------|------|------|------|------|------|------|------|------|------|------|
| 1 | shooting          | 0.69 | 0.71 | 0.70 | 0.73 | 0.67 | 0.68 | 0.72 | 0.71 | 0.69 | 0.29 | 0.27 | 0.28 |
| 1 | shooting          | 0.73 | 0.74 | 0.74 | 0.77 | 0.71 | 0.73 | 0.76 | 0.75 | 0.73 | 0.33 | 0.30 | 0.32 |
| 1 | shooting          | 0.72 | 0.74 | 0.74 | 0.77 | 0.70 | 0.71 | 0.76 | 0.74 | 0.72 | 0.28 | 0.26 | 0.27 |
| 1 | shooting          | 0.68 | 0.70 | 0.69 | 0.73 | 0.65 | 0.67 | 0.72 | 0.70 | 0.68 | 0.24 | 0.22 | 0.23 |
| 1 | shooting          | 0.80 | 0.83 | 0.82 | 0.85 | 0.78 | 0.79 | 0.84 | 0.82 | 0.81 | 0.34 | 0.32 | 0.33 |
| 2 | shooting          | 0.75 | 0.76 | 0.76 | 0.78 | 0.73 | 0.75 | 0.78 | 0.77 | 0.75 | 0.36 | 0.34 | 0.35 |
| 2 | shooting          | 0.83 | 0.84 | 0.84 | 0.86 | 0.81 | 0.83 | 0.86 | 0.85 | 0.82 | 0.41 | 0.39 | 0.41 |
| 2 | shooting          | 0.81 | 0.81 | 0.82 | 0.84 | 0.78 | 0.80 | 0.83 | 0.82 | 0.79 | 0.38 | 0.35 | 0.38 |
| 2 | shooting          | 0.83 | 0.84 | 0.84 | 0.87 | 0.81 | 0.82 | 0.86 | 0.85 | 0.83 | 0.40 | 0.37 | 0.39 |
| 2 | shooting          | 0.79 | 0.79 | 0.80 | 0.82 | 0.76 | 0.78 | 0.81 | 0.81 | 0.78 | 0.40 | 0.37 | 0.39 |
| 3 | shooting          | 0.65 | 0.66 | 0.66 | 0.67 | 0.64 | 0.65 | 0.67 | 0.66 | 0.65 | 0.30 | 0.28 | 0.29 |
| 3 | shooting          | 0.63 | 0.64 | 0.64 | 0.65 | 0.62 | 0.63 | 0.65 | 0.65 | 0.63 | 0.29 | 0.28 | 0.29 |
| 3 | shooting          | 0.58 | 0.59 | 0.59 | 0.60 | 0.57 | 0.58 | 0.60 | 0.59 | 0.58 | 0.26 | 0.24 | 0.25 |
| 3 | shooting          | 0.63 | 0.63 | 0.64 | 0.65 | 0.61 | 0.63 | 0.65 | 0.64 | 0.62 | 0.30 | 0.29 | 0.30 |
| 3 | shooting          | 0.51 | 0.52 | 0.52 | 0.53 | 0.50 | 0.51 | 0.53 | 0.52 | 0.51 | 0.22 | 0.21 | 0.21 |
| 3 | shooting          | 0.61 | 0.61 | 0.62 | 0.63 | 0.59 | 0.61 | 0.63 | 0.62 | 0.60 | 0.29 | 0.28 | 0.29 |
| 3 | shooting          | 0.54 | 0.54 | 0.54 | 0.56 | 0.52 | 0.53 | 0.56 | 0.55 | 0.53 | 0.24 | 0.22 | 0.23 |
| 3 | shooting          | 0.69 | 0.69 | 0.70 | 0.71 | 0.67 | 0.68 | 0.71 | 0.70 | 0.68 | 0.34 | 0.32 | 0.33 |
| 3 | shooting          | 0.71 | 0.70 | 0.71 | 0.73 | 0.68 | 0.70 | 0.72 | 0.72 | 0.69 | 0.36 | 0.34 | 0.35 |
| 3 | shooting          | 0.60 | 0.59 | 0.60 | 0.62 | 0.57 | 0.59 | 0.61 | 0.61 | 0.58 | 0.28 | 0.26 | 0.28 |
| 3 | shooting          | 0.49 | 0.49 | 0.49 | 0.51 | 0.47 | 0.48 | 0.50 | 0.50 | 0.48 | 0.23 | 0.21 | 0.22 |
| 3 | shooting          | 0.66 | 0.65 | 0.67 | 0.68 | 0.63 | 0.65 | 0.68 | 0.67 | 0.64 | 0.34 | 0.31 | 0.33 |
| 3 | shooting          | 0.52 | 0.51 | 0.53 | 0.54 | 0.49 | 0.52 | 0.53 | 0.53 | 0.50 | 0.26 | 0.23 | 0.25 |
| 1 | milky<br>ripeness | 0.30 | 0.26 | 0.29 | 0.33 | 0.23 | 0.27 | 0.30 | 0.32 | 0.24 | 0.14 | 0.07 | 0.11 |
| 1 | milky<br>ripeness | 0.42 | 0.39 | 0.41 | 0.46 | 0.35 | 0.39 | 0.43 | 0.44 | 0.37 | 0.17 | 0.10 | 0.14 |
| 1 | milky<br>ripeness | 0.39 | 0.34 | 0.38 | 0.43 | 0.31 | 0.36 | 0.39 | 0.41 | 0.33 | 0.16 | 0.08 | 0.13 |
| 1 | milky<br>ripeness | 0.37 | 0.32 | 0.35 | 0.40 | 0.28 | 0.33 | 0.36 | 0.39 | 0.30 | 0.16 | 0.08 | 0.13 |
| 1 | milky<br>ripeness | 0.38 | 0.32 | 0.36 | 0.41 | 0.29 | 0.34 | 0.38 | 0.40 | 0.31 | 0.17 | 0.08 | 0.13 |
| 1 | milky<br>ripeness | 0.33 | 0.28 | 0.32 | 0.36 | 0.24 | 0.29 | 0.33 | 0.35 | 0.27 | 0.15 | 0.07 | 0.12 |
| 1 | milky<br>ripeness | 0.30 | 0.25 | 0.29 | 0.33 | 0.22 | 0.27 | 0.30 | 0.33 | 0.24 | 0.13 | 0.06 | 0.10 |
| 1 | milky<br>ripeness | 0.30 | 0.24 | 0.28 | 0.34 | 0.20 | 0.25 | 0.29 | 0.33 | 0.23 | 0.14 | 0.05 | 0.10 |
| 1 | milky<br>ripeness | 0.43 | 0.39 | 0.42 | 0.47 | 0.34 | 0.39 | 0.43 | 0.45 | 0.37 | 0.18 | 0.11 | 0.15 |
| 1 | milky<br>ripeness | 0.40 | 0.36 | 0.39 | 0.45 | 0.31 | 0.36 | 0.41 | 0.43 | 0.34 | 0.17 | 0.09 | 0.14 |
| 2 | milky<br>ripeness | 0.41 | 0.40 | 0.43 | 0.48 | 0.33 | 0.38 | 0.45 | 0.47 | 0.39 | 0.16 | 0.09 | 0.13 |
| 2 | milky<br>ripeness | 0.58 | 0.53 | 0.57 | 0.62 | 0.50 | 0.55 | 0.59 | 0.60 | 0.52 | 0.29 | 0.21 | 0.26 |
| 2 | milky<br>ripeness | 0.55 | 0.50 | 0.53 | 0.59 | 0.45 | 0.51 | 0.55 | 0.57 | 0.47 | 0.25 | 0.16 | 0.22 |
| 2 | milky<br>ripeness | 0.62 | 0.62 | 0.63 | 0.68 | 0.56 | 0.60 | 0.66 | 0.65 | 0.59 | 0.23 | 0.18 | 0.21 |

---

|   |                   |      |      |      |      |      |      |      |      |      |      |      |      |
|---|-------------------|------|------|------|------|------|------|------|------|------|------|------|------|
| 3 | milky<br>ripeness | 0.65 | 0.60 | 0.64 | 0.68 | 0.58 | 0.63 | 0.65 | 0.67 | 0.59 | 0.35 | 0.27 | 0.32 |
| 3 | milky<br>ripeness | 0.50 | 0.45 | 0.49 | 0.53 | 0.42 | 0.47 | 0.50 | 0.52 | 0.44 | 0.22 | 0.15 | 0.19 |
| 3 | milky<br>ripeness | 0.62 | 0.56 | 0.60 | 0.65 | 0.52 | 0.58 | 0.62 | 0.63 | 0.54 | 0.31 | 0.22 | 0.28 |
| 3 | milky<br>ripeness | 0.43 | 0.40 | 0.42 | 0.47 | 0.36 | 0.40 | 0.44 | 0.46 | 0.38 | 0.18 | 0.11 | 0.15 |
| 3 | milky<br>ripeness | 0.52 | 0.46 | 0.50 | 0.55 | 0.44 | 0.49 | 0.52 | 0.54 | 0.45 | 0.26 | 0.18 | 0.23 |
| 3 | milky<br>ripeness | 0.54 | 0.48 | 0.52 | 0.57 | 0.45 | 0.51 | 0.53 | 0.55 | 0.47 | 0.26 | 0.18 | 0.23 |
| 3 | milky<br>ripeness | 0.50 | 0.44 | 0.48 | 0.52 | 0.42 | 0.47 | 0.49 | 0.51 | 0.43 | 0.24 | 0.17 | 0.22 |
| 3 | milky<br>ripeness | 0.55 | 0.49 | 0.53 | 0.57 | 0.47 | 0.52 | 0.54 | 0.56 | 0.48 | 0.28 | 0.21 | 0.26 |
| 3 | milky<br>ripeness | 0.53 | 0.47 | 0.51 | 0.55 | 0.45 | 0.50 | 0.52 | 0.54 | 0.46 | 0.27 | 0.20 | 0.24 |

---

<sup>1</sup> Soil types are given as following: 1 – grey forest soil, 2 – alluvial soil, 3 – chernozem.

**Table S4.** SAVI values for winter wheat crop canopy

| Soil type <sup>1</sup> | Stage of winter wheat development | Calculated combinations<br>(more details on the meaning of combinations are provided in <b>Table 2</b> of original manuscript) |      |      |        |        |       |       |       |       |       |       |      |
|------------------------|-----------------------------------|--------------------------------------------------------------------------------------------------------------------------------|------|------|--------|--------|-------|-------|-------|-------|-------|-------|------|
|                        |                                   | max                                                                                                                            | min  | av   | maxmin | minmax | avmax | avmin | maxav | minav | edmax | edmin | edav |
| 1                      | tillering                         | 0.47                                                                                                                           | 0.46 | 0.47 | 0.50   | 0.43   | 0.45  | 0.48  | 0.49  | 0.45  | 0.18  | 0.13  | 0.15 |
| 1                      | tillering                         | 0.36                                                                                                                           | 0.34 | 0.35 | 0.38   | 0.33   | 0.35  | 0.36  | 0.37  | 0.33  | 0.14  | 0.10  | 0.13 |
| 1                      | tillering                         | 0.39                                                                                                                           | 0.37 | 0.38 | 0.41   | 0.34   | 0.37  | 0.39  | 0.40  | 0.36  | 0.16  | 0.11  | 0.14 |
| 1                      | tillering                         | 0.41                                                                                                                           | 0.39 | 0.40 | 0.44   | 0.36   | 0.38  | 0.41  | 0.43  | 0.38  | 0.15  | 0.10  | 0.12 |
| 1                      | tillering                         | 0.38                                                                                                                           | 0.35 | 0.37 | 0.40   | 0.33   | 0.36  | 0.38  | 0.39  | 0.35  | 0.16  | 0.11  | 0.13 |
| 1                      | tillering                         | 0.41                                                                                                                           | 0.38 | 0.40 | 0.43   | 0.36   | 0.39  | 0.41  | 0.42  | 0.37  | 0.16  | 0.11  | 0.14 |
| 1                      | tillering                         | 0.34                                                                                                                           | 0.32 | 0.33 | 0.37   | 0.30   | 0.32  | 0.34  | 0.36  | 0.31  | 0.14  | 0.09  | 0.12 |
| 1                      | tillering                         | 0.40                                                                                                                           | 0.38 | 0.40 | 0.43   | 0.35   | 0.38  | 0.41  | 0.42  | 0.37  | 0.16  | 0.11  | 0.14 |
| 1                      | tillering                         | 0.35                                                                                                                           | 0.32 | 0.34 | 0.37   | 0.30   | 0.32  | 0.34  | 0.36  | 0.31  | 0.14  | 0.09  | 0.12 |
| 1                      | tillering                         | 0.49                                                                                                                           | 0.48 | 0.49 | 0.52   | 0.45   | 0.47  | 0.50  | 0.51  | 0.47  | 0.19  | 0.14  | 0.16 |
| 1                      | tillering                         | 0.33                                                                                                                           | 0.30 | 0.32 | 0.35   | 0.28   | 0.30  | 0.33  | 0.35  | 0.29  | 0.13  | 0.08  | 0.11 |
| 1                      | tillering                         | 0.34                                                                                                                           | 0.31 | 0.33 | 0.36   | 0.28   | 0.31  | 0.33  | 0.36  | 0.30  | 0.14  | 0.08  | 0.11 |
| 1                      | tillering                         | 0.39                                                                                                                           | 0.37 | 0.38 | 0.42   | 0.34   | 0.37  | 0.39  | 0.41  | 0.36  | 0.16  | 0.10  | 0.13 |
| 1                      | tillering                         | 0.40                                                                                                                           | 0.38 | 0.40 | 0.43   | 0.36   | 0.38  | 0.41  | 0.42  | 0.37  | 0.16  | 0.11  | 0.14 |
| 2                      | tillering                         | 0.53                                                                                                                           | 0.51 | 0.52 | 0.55   | 0.49   | 0.51  | 0.53  | 0.54  | 0.50  | 0.22  | 0.18  | 0.20 |
| 2                      | tillering                         | 0.49                                                                                                                           | 0.48 | 0.49 | 0.52   | 0.45   | 0.47  | 0.50  | 0.51  | 0.47  | 0.20  | 0.16  | 0.18 |
| 2                      | tillering                         | 0.39                                                                                                                           | 0.38 | 0.39 | 0.42   | 0.35   | 0.37  | 0.40  | 0.42  | 0.37  | 0.16  | 0.11  | 0.13 |
| 2                      | tillering                         | 0.56                                                                                                                           | 0.55 | 0.56 | 0.58   | 0.52   | 0.54  | 0.57  | 0.57  | 0.54  | 0.23  | 0.19  | 0.21 |
| 2                      | tillering                         | 0.60                                                                                                                           | 0.59 | 0.60 | 0.63   | 0.57   | 0.58  | 0.61  | 0.62  | 0.58  | 0.24  | 0.20  | 0.22 |
| 2                      | tillering                         | 0.52                                                                                                                           | 0.52 | 0.52 | 0.55   | 0.49   | 0.51  | 0.53  | 0.54  | 0.50  | 0.21  | 0.17  | 0.19 |
| 2                      | tillering                         | 0.42                                                                                                                           | 0.40 | 0.41 | 0.44   | 0.39   | 0.40  | 0.42  | 0.43  | 0.40  | 0.18  | 0.14  | 0.16 |
| 2                      | tillering                         | 0.44                                                                                                                           | 0.42 | 0.43 | 0.46   | 0.40   | 0.42  | 0.44  | 0.46  | 0.41  | 0.18  | 0.13  | 0.16 |
| 3                      | tillering                         | 0.25                                                                                                                           | 0.22 | 0.25 | 0.28   | 0.19   | 0.22  | 0.25  | 0.27  | 0.21  | 0.13  | 0.06  | 0.10 |
| 3                      | tillering                         | 0.28                                                                                                                           | 0.26 | 0.28 | 0.30   | 0.24   | 0.27  | 0.29  | 0.30  | 0.26  | 0.12  | 0.08  | 0.11 |
| 3                      | tillering                         | 0.17                                                                                                                           | 0.14 | 0.16 | 0.18   | 0.13   | 0.15  | 0.16  | 0.18  | 0.14  | 0.08  | 0.04  | 0.06 |
| 3                      | tillering                         | 0.19                                                                                                                           | 0.15 | 0.17 | 0.20   | 0.13   | 0.16  | 0.18  | 0.20  | 0.15  | 0.10  | 0.04  | 0.07 |
| 3                      | tillering                         | 0.24                                                                                                                           | 0.21 | 0.23 | 0.26   | 0.20   | 0.22  | 0.24  | 0.25  | 0.21  | 0.11  | 0.06  | 0.09 |
| 3                      | tillering                         | 0.25                                                                                                                           | 0.22 | 0.24 | 0.27   | 0.20   | 0.23  | 0.25  | 0.26  | 0.21  | 0.12  | 0.06  | 0.09 |
| 3                      | tillering                         | 0.22                                                                                                                           | 0.18 | 0.20 | 0.23   | 0.16   | 0.19  | 0.21  | 0.23  | 0.17  | 0.11  | 0.05  | 0.08 |
| 3                      | tillering                         | 0.28                                                                                                                           | 0.24 | 0.27 | 0.30   | 0.22   | 0.26  | 0.28  | 0.30  | 0.24  | 0.13  | 0.07  | 0.11 |
| 3                      | tillering                         | 0.29                                                                                                                           | 0.26 | 0.28 | 0.31   | 0.24   | 0.27  | 0.29  | 0.30  | 0.25  | 0.13  | 0.08  | 0.11 |
| 3                      | tillering                         | 0.19                                                                                                                           | 0.14 | 0.18 | 0.21   | 0.12   | 0.16  | 0.18  | 0.20  | 0.14  | 0.10  | 0.03  | 0.08 |
| 3                      | tillering                         | 0.28                                                                                                                           | 0.24 | 0.27 | 0.30   | 0.22   | 0.26  | 0.28  | 0.29  | 0.23  | 0.13  | 0.07  | 0.11 |
| 3                      | tillering                         | 0.25                                                                                                                           | 0.22 | 0.24 | 0.28   | 0.19   | 0.22  | 0.25  | 0.27  | 0.21  | 0.12  | 0.06  | 0.09 |
| 1                      | shooting                          | 0.78                                                                                                                           | 0.80 | 0.79 | 0.81   | 0.76   | 0.77  | 0.80  | 0.79  | 0.78  | 0.37  | 0.35  | 0.36 |
| 1                      | shooting                          | 0.72                                                                                                                           | 0.73 | 0.73 | 0.75   | 0.70   | 0.72  | 0.75  | 0.74  | 0.72  | 0.34  | 0.32  | 0.33 |
| 1                      | shooting                          | 0.55                                                                                                                           | 0.58 | 0.57 | 0.59   | 0.54   | 0.55  | 0.59  | 0.57  | 0.56  | 0.20  | 0.18  | 0.19 |
| 1                      | shooting                          | 0.68                                                                                                                           | 0.71 | 0.70 | 0.73   | 0.67   | 0.67  | 0.72  | 0.70  | 0.69  | 0.25  | 0.23  | 0.24 |
| 1                      | shooting                          | 0.70                                                                                                                           | 0.71 | 0.71 | 0.73   | 0.68   | 0.70  | 0.72  | 0.72  | 0.70  | 0.35  | 0.32  | 0.34 |

|   |                |      |      |      |      |      |      |      |      |      |      |      |      |
|---|----------------|------|------|------|------|------|------|------|------|------|------|------|------|
| 1 | shooting       | 0.64 | 0.66 | 0.65 | 0.67 | 0.63 | 0.64 | 0.67 | 0.66 | 0.64 | 0.29 | 0.27 | 0.29 |
| 1 | shooting       | 0.67 | 0.68 | 0.68 | 0.70 | 0.66 | 0.67 | 0.69 | 0.69 | 0.67 | 0.33 | 0.31 | 0.32 |
| 1 | shooting       | 0.66 | 0.68 | 0.68 | 0.70 | 0.65 | 0.66 | 0.69 | 0.68 | 0.67 | 0.28 | 0.27 | 0.28 |
| 1 | shooting       | 0.63 | 0.65 | 0.65 | 0.67 | 0.61 | 0.62 | 0.66 | 0.65 | 0.63 | 0.25 | 0.22 | 0.24 |
| 1 | shooting       | 0.72 | 0.74 | 0.73 | 0.75 | 0.71 | 0.72 | 0.75 | 0.74 | 0.72 | 0.33 | 0.32 | 0.33 |
| 2 | shooting       | 0.69 | 0.70 | 0.70 | 0.71 | 0.67 | 0.68 | 0.71 | 0.70 | 0.69 | 0.36 | 0.34 | 0.35 |
| 2 | shooting       | 0.74 | 0.75 | 0.75 | 0.77 | 0.73 | 0.74 | 0.76 | 0.76 | 0.74 | 0.40 | 0.38 | 0.40 |
| 2 | shooting       | 0.72 | 0.73 | 0.73 | 0.75 | 0.70 | 0.72 | 0.74 | 0.74 | 0.72 | 0.38 | 0.35 | 0.37 |
| 2 | shooting       | 0.74 | 0.75 | 0.75 | 0.77 | 0.73 | 0.74 | 0.76 | 0.76 | 0.74 | 0.39 | 0.37 | 0.38 |
| 2 | shooting       | 0.71 | 0.72 | 0.72 | 0.74 | 0.69 | 0.71 | 0.73 | 0.73 | 0.71 | 0.39 | 0.36 | 0.38 |
| 3 | shooting       | 0.61 | 0.62 | 0.62 | 0.63 | 0.60 | 0.61 | 0.63 | 0.62 | 0.61 | 0.30 | 0.29 | 0.30 |
| 3 | shooting       | 0.60 | 0.61 | 0.61 | 0.62 | 0.59 | 0.60 | 0.62 | 0.61 | 0.60 | 0.30 | 0.29 | 0.30 |
| 3 | shooting       | 0.56 | 0.57 | 0.57 | 0.58 | 0.55 | 0.56 | 0.58 | 0.57 | 0.56 | 0.27 | 0.25 | 0.26 |
| 3 | shooting       | 0.60 | 0.60 | 0.60 | 0.61 | 0.59 | 0.60 | 0.61 | 0.61 | 0.59 | 0.31 | 0.30 | 0.31 |
| 3 | shooting       | 0.50 | 0.51 | 0.51 | 0.52 | 0.49 | 0.50 | 0.52 | 0.51 | 0.50 | 0.23 | 0.22 | 0.22 |
| 3 | shooting       | 0.58 | 0.59 | 0.59 | 0.60 | 0.57 | 0.58 | 0.60 | 0.59 | 0.58 | 0.30 | 0.28 | 0.30 |
| 3 | shooting       | 0.53 | 0.53 | 0.53 | 0.55 | 0.51 | 0.52 | 0.54 | 0.54 | 0.52 | 0.25 | 0.23 | 0.24 |
| 3 | shooting       | 0.64 | 0.65 | 0.65 | 0.66 | 0.63 | 0.64 | 0.66 | 0.65 | 0.64 | 0.34 | 0.32 | 0.33 |
| 3 | shooting       | 0.66 | 0.66 | 0.66 | 0.67 | 0.64 | 0.65 | 0.67 | 0.67 | 0.65 | 0.36 | 0.34 | 0.36 |
| 3 | shooting       | 0.57 | 0.57 | 0.58 | 0.59 | 0.55 | 0.57 | 0.59 | 0.58 | 0.56 | 0.29 | 0.27 | 0.29 |
| 3 | shooting       | 0.49 | 0.49 | 0.49 | 0.50 | 0.47 | 0.48 | 0.50 | 0.50 | 0.48 | 0.24 | 0.22 | 0.23 |
| 3 | shooting       | 0.62 | 0.62 | 0.63 | 0.64 | 0.60 | 0.62 | 0.64 | 0.63 | 0.61 | 0.34 | 0.32 | 0.34 |
| 3 | shooting       | 0.52 | 0.51 | 0.52 | 0.53 | 0.49 | 0.51 | 0.53 | 0.52 | 0.50 | 0.27 | 0.24 | 0.26 |
| 1 | milky ripeness | 0.31 | 0.27 | 0.31 | 0.34 | 0.24 | 0.29 | 0.32 | 0.33 | 0.26 | 0.15 | 0.07 | 0.12 |
| 1 | milky ripeness | 0.43 | 0.39 | 0.41 | 0.46 | 0.36 | 0.39 | 0.43 | 0.44 | 0.38 | 0.18 | 0.11 | 0.15 |
| 1 | milky ripeness | 0.40 | 0.36 | 0.38 | 0.43 | 0.32 | 0.37 | 0.40 | 0.41 | 0.34 | 0.17 | 0.09 | 0.13 |
| 1 | milky ripeness | 0.37 | 0.33 | 0.36 | 0.41 | 0.29 | 0.34 | 0.37 | 0.39 | 0.32 | 0.17 | 0.09 | 0.14 |
| 1 | milky ripeness | 0.38 | 0.34 | 0.37 | 0.42 | 0.30 | 0.35 | 0.38 | 0.40 | 0.32 | 0.18 | 0.09 | 0.14 |
| 1 | milky ripeness | 0.34 | 0.29 | 0.33 | 0.37 | 0.26 | 0.30 | 0.34 | 0.36 | 0.28 | 0.16 | 0.08 | 0.13 |
| 1 | milky ripeness | 0.31 | 0.27 | 0.31 | 0.34 | 0.23 | 0.28 | 0.31 | 0.34 | 0.26 | 0.14 | 0.06 | 0.11 |
| 1 | milky ripeness | 0.31 | 0.25 | 0.29 | 0.35 | 0.21 | 0.26 | 0.30 | 0.34 | 0.24 | 0.15 | 0.05 | 0.10 |
| 1 | milky ripeness | 0.43 | 0.39 | 0.42 | 0.46 | 0.35 | 0.40 | 0.43 | 0.45 | 0.37 | 0.19 | 0.11 | 0.16 |
| 1 | milky ripeness | 0.40 | 0.36 | 0.40 | 0.44 | 0.32 | 0.37 | 0.41 | 0.43 | 0.35 | 0.18 | 0.10 | 0.15 |
| 2 | milky ripeness | 0.41 | 0.40 | 0.42 | 0.47 | 0.34 | 0.38 | 0.44 | 0.46 | 0.39 | 0.17 | 0.09 | 0.13 |
| 2 | milky ripeness | 0.56 | 0.52 | 0.55 | 0.59 | 0.49 | 0.54 | 0.56 | 0.57 | 0.51 | 0.30 | 0.22 | 0.27 |
| 2 | milky ripeness | 0.53 | 0.49 | 0.52 | 0.57 | 0.45 | 0.50 | 0.54 | 0.55 | 0.47 | 0.26 | 0.17 | 0.23 |
| 2 | milky ripeness | 0.59 | 0.59 | 0.59 | 0.64 | 0.54 | 0.57 | 0.62 | 0.61 | 0.56 | 0.24 | 0.18 | 0.22 |

---

|   |                   |      |      |      |      |      |      |      |      |      |      |      |      |
|---|-------------------|------|------|------|------|------|------|------|------|------|------|------|------|
| 3 | milky<br>ripeness | 0.61 | 0.58 | 0.61 | 0.63 | 0.56 | 0.59 | 0.62 | 0.62 | 0.57 | 0.35 | 0.28 | 0.33 |
| 3 | milky<br>ripeness | 0.49 | 0.45 | 0.48 | 0.51 | 0.42 | 0.46 | 0.49 | 0.50 | 0.44 | 0.23 | 0.16 | 0.20 |
| 3 | milky<br>ripeness | 0.58 | 0.54 | 0.57 | 0.61 | 0.51 | 0.56 | 0.59 | 0.60 | 0.52 | 0.31 | 0.22 | 0.28 |
| 3 | milky<br>ripeness | 0.43 | 0.40 | 0.42 | 0.47 | 0.36 | 0.40 | 0.44 | 0.45 | 0.38 | 0.19 | 0.12 | 0.16 |
| 3 | milky<br>ripeness | 0.51 | 0.46 | 0.50 | 0.53 | 0.44 | 0.48 | 0.51 | 0.52 | 0.45 | 0.27 | 0.19 | 0.24 |
| 3 | milky<br>ripeness | 0.52 | 0.47 | 0.51 | 0.55 | 0.45 | 0.50 | 0.52 | 0.54 | 0.46 | 0.27 | 0.19 | 0.24 |
| 3 | milky<br>ripeness | 0.49 | 0.44 | 0.48 | 0.51 | 0.42 | 0.46 | 0.49 | 0.50 | 0.43 | 0.25 | 0.18 | 0.23 |
| 3 | milky<br>ripeness | 0.53 | 0.49 | 0.52 | 0.55 | 0.47 | 0.51 | 0.53 | 0.54 | 0.48 | 0.29 | 0.22 | 0.26 |
| 3 | milky<br>ripeness | 0.51 | 0.47 | 0.50 | 0.53 | 0.45 | 0.49 | 0.51 | 0.52 | 0.46 | 0.28 | 0.21 | 0.25 |

---

<sup>1</sup> Soil types are given as following: 1 – grey forest soil, 2 – alluvial soil, 3 – chernozem.

**Table S5.** Influence of soil type factor on values of vegetation indices of winter wheat crop canopy at *tillering stage* (ANOVA results, supporting **Figure 7a** of original manuscript)

| Index | Combination<br>(according<br>to <b>Table 2</b> ) | Sum of<br>Squares | Degrees of<br>freedom | Mean Square | F      | p-value | Eta squared<br>( $\eta$ ) |
|-------|--------------------------------------------------|-------------------|-----------------------|-------------|--------|---------|---------------------------|
| NDVI  | max                                              | 0.086             | 2                     | 0.043       | 9.122  | 0.001   | 0.37                      |
|       | min                                              | 0.144             | 2                     | 0.072       | 11.877 | 0.000   | 0.43                      |
|       | av                                               | 0.101             | 2                     | 0.051       | 10.195 | 0.000   | 0.40                      |
|       | maxmin                                           | 0.078             | 2                     | 0.039       | 8.338  | 0.001   | 0.35                      |
|       | minmax                                           | 0.159             | 2                     | 0.079       | 13.057 | 0.000   | 0.46                      |
|       | avmax                                            | 0.111             | 2                     | 0.056       | 10.181 | 0.000   | 0.40                      |
|       | avmin                                            | 0.100             | 2                     | 0.050       | 9.313  | 0.001   | 0.38                      |
|       | maxav                                            | 0.079             | 2                     | 0.039       | 9.145  | 0.001   | 0.37                      |
|       | minav                                            | 0.145             | 2                     | 0.073       | 13.026 | 0.000   | 0.46                      |
|       | edmax                                            | 0.005             | 2                     | 0.003       | 7.314  | 0.003   | 0.32                      |
|       | edmin                                            | 0.026             | 2                     | 0.013       | 23.234 | 0.000   | 0.60                      |
|       | edav                                             | 0.010             | 2                     | 0.005       | 10.743 | 0.000   | 0.41                      |
| EVI2  | max                                              | 0.520             | 2                     | 0.260       | 72.646 | 0.000   | 0.82                      |
|       | min                                              | 0.465             | 2                     | 0.232       | 59.100 | 0.000   | 0.79                      |
|       | av                                               | 0.478             | 2                     | 0.239       | 63.279 | 0.000   | 0.80                      |
|       | maxmin                                           | 0.554             | 2                     | 0.277       | 71.240 | 0.000   | 0.82                      |
|       | minmax                                           | 0.434             | 2                     | 0.217       | 59.866 | 0.000   | 0.79                      |
|       | avmax                                            | 0.464             | 2                     | 0.232       | 63.347 | 0.000   | 0.80                      |
|       | avmin                                            | 0.496             | 2                     | 0.248       | 62.516 | 0.000   | 0.80                      |
|       | maxav                                            | 0.535             | 2                     | 0.268       | 72.221 | 0.000   | 0.82                      |
|       | minav                                            | 0.447             | 2                     | 0.224       | 59.813 | 0.000   | 0.79                      |
|       | edmax                                            | 0.074             | 2                     | 0.037       | 97.754 | 0.000   | 0.86                      |
|       | edmin                                            | 0.049             | 2                     | 0.024       | 59.340 | 0.000   | 0.79                      |
|       | edav                                             | 0.056             | 2                     | 0.028       | 68.234 | 0.000   | 0.82                      |
| SAVI  | max                                              | 0.325             | 2                     | 0.162       | 60.851 | 0.000   | 0.80                      |
|       | min                                              | 0.382             | 2                     | 0.191       | 62.385 | 0.000   | 0.80                      |
|       | av                                               | 0.342             | 2                     | 0.171       | 59.638 | 0.000   | 0.79                      |
|       | maxmin                                           | 0.339             | 2                     | 0.170       | 59.976 | 0.000   | 0.80                      |
|       | minmax                                           | 0.366             | 2                     | 0.183       | 62.872 | 0.000   | 0.80                      |
|       | avmax                                            | 0.338             | 2                     | 0.169       | 59.487 | 0.000   | 0.79                      |
|       | avmin                                            | 0.353             | 2                     | 0.176       | 58.989 | 0.000   | 0.79                      |
|       | maxav                                            | 0.329             | 2                     | 0.164       | 60.657 | 0.000   | 0.80                      |
|       | minav                                            | 0.371             | 2                     | 0.185       | 63.109 | 0.000   | 0.80                      |
|       | edmax                                            | 0.037             | 2                     | 0.019       | 52.044 | 0.000   | 0.77                      |
|       | edmin                                            | 0.049             | 2                     | 0.024       | 59.205 | 0.000   | 0.79                      |
|       | edav                                             | 0.040             | 2                     | 0.020       | 50.333 | 0.000   | 0.77                      |

**Table S6.** Influence of soil type factor on values of vegetation indices of winter wheat crop canopy at *shooting stage* (ANOVA results, supporting **Figure 7b** of original manuscript)

| Index | Combination<br>(accrording<br>to <b>Table 2</b> ) | Sum of<br>Squares | Degrees<br>of<br>freedom | Mean Square | F      | p-value | Eta squared<br>( $\eta$ ) |
|-------|---------------------------------------------------|-------------------|--------------------------|-------------|--------|---------|---------------------------|
| NDVI  | max                                               | 0.008             | 2                        | 0.004       | 5.434  | 0.011   | 0.30                      |
|       | min                                               | 0.005             | 2                        | 0.002       | 4.741  | 0.018   | 0.28                      |
|       | av                                                | 0.006             | 2                        | 0.003       | 4.756  | 0.018   | 0.28                      |
|       | maxmin                                            | 0.005             | 2                        | 0.002       | 4.691  | 0.019   | 0.27                      |
|       | minmax                                            | 0.009             | 2                        | 0.004       | 5.414  | 0.011   | 0.30                      |
|       | avmax                                             | 0.009             | 2                        | 0.004       | 5.458  | 0.011   | 0.30                      |
|       | avmin                                             | 0.005             | 2                        | 0.002       | 4.697  | 0.019   | 0.27                      |
|       | maxav                                             | 0.006             | 2                        | 0.003       | 4.739  | 0.018   | 0.28                      |
|       | minav                                             | 0.006             | 2                        | 0.003       | 4.749  | 0.018   | 0.28                      |
|       | edmax                                             | 0.033             | 2                        | 0.017       | 10.002 | 0.001   | 0.44                      |
|       | edmin                                             | 0.032             | 2                        | 0.016       | 9.962  | 0.001   | 0.44                      |
|       | edav                                              | 0.034             | 2                        | 0.017       | 10.097 | 0.001   | 0.45                      |
| EVI2  | max                                               | 0.189             | 2                        | 0.095       | 18.665 | 0.000   | 0.60                      |
|       | min                                               | 0.221             | 2                        | 0.110       | 21.549 | 0.000   | 0.63                      |
|       | av                                                | 0.206             | 2                        | 0.103       | 20.157 | 0.000   | 0.62                      |
|       | maxmin                                            | 0.230             | 2                        | 0.115       | 22.401 | 0.000   | 0.64                      |
|       | minmax                                            | 0.180             | 2                        | 0.090       | 17.878 | 0.000   | 0.59                      |
|       | avmax                                             | 0.186             | 2                        | 0.093       | 18.281 | 0.000   | 0.59                      |
|       | avmin                                             | 0.226             | 2                        | 0.113       | 21.980 | 0.000   | 0.64                      |
|       | maxav                                             | 0.210             | 2                        | 0.105       | 20.559 | 0.000   | 0.62                      |
|       | minav                                             | 0.201             | 2                        | 0.101       | 19.744 | 0.000   | 0.61                      |
|       | edmax                                             | 0.041             | 2                        | 0.021       | 9.238  | 0.001   | 0.43                      |
|       | edmin                                             | 0.036             | 2                        | 0.018       | 8.653  | 0.001   | 0.41                      |
|       | edav                                              | 0.040             | 2                        | 0.020       | 9.087  | 0.001   | 0.42                      |
| SAVI  | max                                               | 0.100             | 2                        | 0.050       | 17.662 | 0.000   | 0.59                      |
|       | min                                               | 0.118             | 2                        | 0.059       | 20.907 | 0.000   | 0.63                      |
|       | av                                                | 0.109             | 2                        | 0.055       | 19.272 | 0.000   | 0.61                      |
|       | maxmin                                            | 0.120             | 2                        | 0.060       | 21.677 | 0.000   | 0.63                      |
|       | minmax                                            | 0.098             | 2                        | 0.049       | 16.956 | 0.000   | 0.58                      |
|       | avmax                                             | 0.099             | 2                        | 0.050       | 17.286 | 0.000   | 0.58                      |
|       | avmin                                             | 0.119             | 2                        | 0.059       | 21.259 | 0.000   | 0.63                      |
|       | maxav                                             | 0.111             | 2                        | 0.055       | 19.669 | 0.000   | 0.61                      |
|       | minav                                             | 0.109             | 2                        | 0.054       | 18.937 | 0.000   | 0.60                      |
|       | edmax                                             | 0.033             | 2                        | 0.016       | 8.601  | 0.001   | 0.41                      |
|       | edmin                                             | 0.030             | 2                        | 0.015       | 8.097  | 0.002   | 0.39                      |
|       | edav                                              | 0.032             | 2                        | 0.016       | 8.474  | 0.002   | 0.40                      |

**Table S7.** Influence of soil type factor on values of vegetation indices of winter wheat crop canopy at *milky ripeness stage* (ANOVA results, supporting **Figure 7c** of original manuscript)

| Index | Combination<br>(according<br>to <b>Table 2</b> ) | Sum of<br>Squares | Degrees of<br>freedom | Mean Square | F      | p-value | Eta squared<br>( $\eta$ ) |
|-------|--------------------------------------------------|-------------------|-----------------------|-------------|--------|---------|---------------------------|
| NDVI  | max                                              | 0.143             | 2                     | 0.071       | 11.280 | 0.001   | 0.53                      |
|       | min                                              | 0.171             | 2                     | 0.085       | 11.518 | 0.000   | 0.54                      |
|       | av                                               | 0.139             | 2                     | 0.070       | 11.696 | 0.000   | 0.54                      |
|       | maxmin                                           | 0.113             | 2                     | 0.056       | 10.389 | 0.001   | 0.51                      |
|       | minmax                                           | 0.212             | 2                     | 0.106       | 12.571 | 0.000   | 0.56                      |
|       | avmax                                            | 0.171             | 2                     | 0.086       | 11.690 | 0.000   | 0.54                      |
|       | avmin                                            | 0.136             | 2                     | 0.068       | 10.738 | 0.001   | 0.52                      |
|       | maxav                                            | 0.115             | 2                     | 0.058       | 11.297 | 0.001   | 0.53                      |
|       | minav                                            | 0.174             | 2                     | 0.087       | 12.576 | 0.000   | 0.56                      |
|       | edmax                                            | 0.057             | 2                     | 0.028       | 12.484 | 0.000   | 0.56                      |
|       | edmin                                            | 0.087             | 2                     | 0.044       | 16.805 | 0.000   | 0.63                      |
|       | edav                                             | 0.072             | 2                     | 0.036       | 14.053 | 0.000   | 0.58                      |
| EVI2  | max                                              | 0.179             | 2                     | 0.089       | 21.850 | 0.000   | 0.69                      |
|       | min                                              | 0.185             | 2                     | 0.093       | 22.487 | 0.000   | 0.69                      |
|       | av                                               | 0.182             | 2                     | 0.091       | 23.285 | 0.000   | 0.70                      |
|       | maxmin                                           | 0.177             | 2                     | 0.089       | 22.477 | 0.000   | 0.69                      |
|       | minmax                                           | 0.186             | 2                     | 0.093       | 21.941 | 0.000   | 0.69                      |
|       | avmax                                            | 0.189             | 2                     | 0.095       | 21.705 | 0.000   | 0.69                      |
|       | avmin                                            | 0.188             | 2                     | 0.094       | 22.339 | 0.000   | 0.69                      |
|       | maxav                                            | 0.172             | 2                     | 0.086       | 23.461 | 0.000   | 0.70                      |
|       | minav                                            | 0.179             | 2                     | 0.090       | 23.476 | 0.000   | 0.70                      |
|       | edmax                                            | 0.056             | 2                     | 0.028       | 18.648 | 0.000   | 0.65                      |
|       | edmin                                            | 0.059             | 2                     | 0.029       | 20.502 | 0.000   | 0.67                      |
|       | edav                                             | 0.061             | 2                     | 0.031       | 19.157 | 0.000   | 0.66                      |
| SAVI  | max                                              | 0.133             | 2                     | 0.066       | 21.819 | 0.000   | 0.69                      |
|       | min                                              | 0.146             | 2                     | 0.073       | 22.714 | 0.000   | 0.69                      |
|       | av                                               | 0.137             | 2                     | 0.068       | 23.492 | 0.000   | 0.70                      |
|       | maxmin                                           | 0.126             | 2                     | 0.063       | 22.529 | 0.000   | 0.69                      |
|       | minmax                                           | 0.153             | 2                     | 0.076       | 22.069 | 0.000   | 0.69                      |
|       | avmax                                            | 0.146             | 2                     | 0.073       | 21.743 | 0.000   | 0.69                      |
|       | avmin                                            | 0.139             | 2                     | 0.069       | 22.479 | 0.000   | 0.69                      |
|       | maxav                                            | 0.124             | 2                     | 0.062       | 23.582 | 0.000   | 0.70                      |
|       | minav                                            | 0.143             | 2                     | 0.072       | 23.770 | 0.000   | 0.70                      |
|       | edmax                                            | 0.052             | 2                     | 0.026       | 18.654 | 0.000   | 0.65                      |
|       | edmin                                            | 0.061             | 2                     | 0.031       | 20.818 | 0.000   | 0.68                      |
|       | edav                                             | 0.060             | 2                     | 0.030       | 19.275 | 0.000   | 0.66                      |



**Table S8.** Results of post hoc analysis for *tillering stage*: multiple comparisons using Sheffe criterion (ANOVA results, supporting **subsection 3.4.1.** of original manuscript)

| Dependent variable | (I) Soil type <sup>1</sup> | (J) Soil type <sup>1</sup> | Mean difference (I-J) | Standard error | p-value | 95% confidence interval |             |
|--------------------|----------------------------|----------------------------|-----------------------|----------------|---------|-------------------------|-------------|
|                    |                            |                            |                       |                |         | Lower bound             | Upper bound |
| NDVImax            | 1                          | 2                          | -0.068                | 0.030          | 0.099   | -0.146                  | 0.010       |
|                    |                            | 3                          | 0.065                 | 0.027          | 0.070   | -0.004                  | 0.135       |
|                    | 2                          | 1                          | 0.068                 | 0.030          | 0.099   | -0.010                  | 0.146       |
|                    |                            | 3                          | 0.133*                | 0.031          | 0.001   | 0.052                   | 0.214       |
|                    | 3                          | 1                          | -0.065                | 0.027          | 0.070   | -0.135                  | 0.004       |
|                    |                            | 2                          | -0.133*               | 0.031          | 0.001   | -0.214                  | -0.052      |
| NDVImin            | 1                          | 2                          | -0.075                | 0.034          | 0.109   | -0.164                  | 0.013       |
|                    |                            | 3                          | 0.094*                | 0.031          | 0.016   | 0.016                   | 0.173       |
|                    | 2                          | 1                          | 0.075                 | 0.034          | 0.109   | -0.013                  | 0.164       |
|                    |                            | 3                          | 0.170*                | 0.035          | 0.000   | 0.078                   | 0.261       |
|                    | 3                          | 1                          | -0.094*               | 0.031          | 0.016   | -0.173                  | -0.016      |
|                    |                            | 2                          | -0.170*               | 0.035          | 0.000   | -0.261                  | -0.078      |
| NDVIav             | 1                          | 2                          | -0.069                | 0.031          | 0.103   | -0.149                  | 0.011       |
|                    |                            | 3                          | 0.075*                | 0.028          | 0.039   | 0.003                   | 0.146       |
|                    | 2                          | 1                          | 0.069                 | 0.031          | 0.103   | -0.011                  | 0.149       |
|                    |                            | 3                          | 0.144*                | 0.032          | 0.000   | 0.061                   | 0.226       |
|                    | 3                          | 1                          | -0.075*               | 0.028          | 0.039   | -0.146                  | -0.003      |
|                    |                            | 2                          | -0.144*               | 0.032          | 0.000   | -0.226                  | -0.061      |
| NDVImaxmin         | 1                          | 2                          | -0.060                | 0.030          | 0.157   | -0.138                  | 0.018       |
|                    |                            | 3                          | 0.066                 | 0.027          | 0.065   | -0.003                  | 0.135       |
|                    | 2                          | 1                          | 0.060                 | 0.030          | 0.157   | -0.018                  | 0.138       |
|                    |                            | 3                          | 0.126*                | 0.031          | 0.001   | 0.046                   | 0.206       |
|                    | 3                          | 1                          | -0.066                | 0.027          | 0.065   | -0.135                  | 0.003       |
|                    |                            | 2                          | -0.126*               | 0.031          | 0.001   | -0.206                  | -0.046      |
| NDVIminmax         | 1                          | 2                          | -0.084                | 0.035          | 0.065   | -0.173                  | 0.004       |
|                    |                            | 3                          | 0.095*                | 0.031          | 0.015   | 0.016                   | 0.174       |
|                    | 2                          | 1                          | 0.084                 | 0.035          | 0.065   | -0.004                  | 0.173       |
|                    |                            | 3                          | 0.180*                | 0.036          | 0.000   | 0.088                   | 0.271       |
|                    | 3                          | 1                          | -0.095*               | 0.031          | 0.015   | -0.174                  | -0.016      |
|                    |                            | 2                          | -0.180*               | 0.036          | 0.000   | -0.271                  | -0.088      |
| NDVIavmax          | 1                          | 2                          | -0.075                | 0.033          | 0.088   | -0.159                  | 0.009       |
|                    |                            | 3                          | 0.076*                | 0.029          | 0.047   | 0.001                   | 0.150       |
|                    | 2                          | 1                          | 0.075                 | 0.033          | 0.088   | -0.009                  | 0.159       |
|                    |                            | 3                          | 0.151*                | 0.034          | 0.000   | 0.064                   | 0.237       |
|                    | 3                          | 1                          | -0.076*               | 0.029          | 0.047   | -0.150                  | -0.001      |
|                    |                            | 2                          | -0.151*               | 0.034          | 0.000   | -0.237                  | -0.064      |
| NDVIavmin          | 1                          | 2                          | -0.067                | 0.033          | 0.139   | -0.150                  | 0.017       |
|                    |                            | 3                          | 0.076*                | 0.029          | 0.045   | 0.002                   | 0.150       |
|                    | 2                          | 1                          | 0.067                 | 0.033          | 0.139   | -0.017                  | 0.150       |
|                    |                            | 3                          | 0.143*                | 0.034          | 0.001   | 0.056                   | 0.229       |
|                    | 3                          | 1                          | -0.076*               | 0.029          | 0.045   | -0.150                  | -0.002      |
|                    |                            | 2                          | -0.143*               | 0.034          | 0.001   | -0.229                  | -0.056      |

|           |   |   |         |       |       |        |        |
|-----------|---|---|---------|-------|-------|--------|--------|
| NDVImaxav | 1 | 2 | -0.062  | 0.029 | 0.117 | -0.137 | 0.012  |
|           |   | 3 | 0.064   | 0.026 | 0.059 | -0.002 | 0.131  |
|           | 2 | 1 | 0.062   | 0.029 | 0.117 | -0.012 | 0.137  |
|           |   | 3 | 0.127*  | 0.030 | 0.001 | 0.050  | 0.204  |
|           | 3 | 1 | -0.064  | 0.026 | 0.059 | -0.131 | 0.002  |
|           |   | 2 | -0.127* | 0.030 | 0.001 | -0.204 | -0.050 |
| NDVIminav | 1 | 2 | -0.078  | 0.033 | 0.078 | -0.163 | 0.007  |
|           |   | 3 | 0.093*  | 0.029 | 0.013 | 0.018  | 0.169  |
|           | 2 | 1 | 0.078   | 0.033 | 0.078 | -0.007 | 0.163  |
|           |   | 3 | 0.171*  | 0.034 | 0.000 | 0.083  | 0.259  |
|           | 3 | 1 | -0.093* | 0.029 | 0.013 | -0.169 | -0.018 |
|           |   | 2 | -0.171* | 0.034 | 0.000 | -0.259 | -0.083 |
| NDVIedmax | 1 | 2 | -0.032* | 0.008 | 0.003 | -0.054 | -0.010 |
|           |   | 3 | -0.008  | 0.007 | 0.562 | -0.027 | 0.011  |
|           | 2 | 1 | 0.032*  | 0.008 | 0.003 | 0.010  | 0.054  |
|           |   | 3 | 0.024*  | 0.009 | 0.034 | 0.002  | 0.046  |
|           | 3 | 1 | 0.008   | 0.007 | 0.562 | -0.011 | 0.027  |
|           |   | 2 | -0.024* | 0.009 | 0.034 | -0.046 | -0.002 |
| NDVIedmin | 1 | 2 | -0.050* | 0.010 | 0.000 | -0.076 | -0.023 |
|           |   | 3 | 0.023   | 0.009 | 0.059 | -0.001 | 0.047  |
|           | 2 | 1 | 0.050*  | 0.010 | 0.000 | 0.023  | 0.076  |
|           |   | 3 | 0.073*  | 0.011 | 0.000 | 0.045  | 0.100  |
|           | 3 | 1 | -0.023  | 0.009 | 0.059 | -0.047 | 0.001  |
|           |   | 2 | -0.073* | 0.011 | 0.000 | -0.100 | -0.045 |
| NDVIedav  | 1 | 2 | -0.040* | 0.010 | 0.001 | -0.064 | -0.015 |
|           |   | 3 | 0.002   | 0.009 | 0.966 | -0.020 | 0.024  |
|           | 2 | 1 | 0.040*  | 0.010 | 0.001 | 0.015  | 0.064  |
|           |   | 3 | 0.042*  | 0.010 | 0.001 | 0.016  | 0.067  |
|           | 3 | 1 | -0.002  | 0.009 | 0.966 | -0.024 | 0.020  |
|           |   | 2 | -0.042* | 0.010 | 0.001 | -0.067 | -0.016 |
| EVIImax   | 1 | 2 | -0.124* | 0.027 | 0.000 | -0.192 | -0.057 |
|           |   | 3 | 0.193*  | 0.024 | 0.000 | 0.134  | 0.253  |
|           | 2 | 1 | 0.124*  | 0.027 | 0.000 | 0.057  | 0.192  |
|           |   | 3 | 0.318*  | 0.027 | 0.000 | 0.249  | 0.387  |
|           | 3 | 1 | -0.193* | 0.024 | 0.000 | -0.253 | -0.134 |
|           |   | 2 | -0.318* | 0.027 | 0.000 | -0.387 | -0.249 |
| EVIImin   | 1 | 2 | -0.135* | 0.028 | 0.000 | -0.205 | -0.064 |
|           |   | 3 | 0.170*  | 0.025 | 0.000 | 0.107  | 0.232  |
|           | 2 | 1 | 0.135*  | 0.028 | 0.000 | 0.064  | 0.205  |
|           |   | 3 | 0.305*  | 0.029 | 0.000 | 0.232  | 0.377  |
|           | 3 | 1 | -0.170* | 0.025 | 0.000 | -0.232 | -0.107 |
|           |   | 2 | -0.305* | 0.029 | 0.000 | -0.377 | -0.232 |
| EVIav     | 1 | 2 | -0.129* | 0.027 | 0.000 | -0.198 | -0.060 |
|           |   | 3 | 0.178*  | 0.024 | 0.000 | 0.117  | 0.239  |
|           | 2 | 1 | 0.129*  | 0.027 | 0.000 | 0.060  | 0.198  |
|           |   | 3 | 0.307*  | 0.028 | 0.000 | 0.236  | 0.378  |
|           | 3 | 1 | -0.178* | 0.024 | 0.000 | -0.239 | -0.117 |
|           |   | 2 | -0.307* | 0.028 | 0.000 | -0.378 | -0.236 |

|           |   |   |         |       |       |        |        |
|-----------|---|---|---------|-------|-------|--------|--------|
| EVImaxmin | 1 | 2 | -0.126* | 0.028 | 0.000 | -0.196 | -0.056 |
|           |   | 3 | 0.201*  | 0.025 | 0.000 | 0.139  | 0.263  |
|           | 2 | 1 | 0.126*  | 0.028 | 0.000 | 0.056  | 0.196  |
|           |   | 3 | 0.327*  | 0.028 | 0.000 | 0.255  | 0.399  |
|           | 3 | 1 | -0.201* | 0.025 | 0.000 | -0.263 | -0.139 |
|           |   | 2 | -0.327* | 0.028 | 0.000 | -0.399 | -0.255 |
| EVIminmax | 1 | 2 | -0.133* | 0.027 | 0.000 | -0.201 | -0.066 |
|           |   | 3 | 0.162*  | 0.024 | 0.000 | 0.102  | 0.222  |
|           | 2 | 1 | 0.133*  | 0.027 | 0.000 | 0.066  | 0.201  |
|           |   | 3 | 0.295*  | 0.027 | 0.000 | 0.226  | 0.365  |
|           | 3 | 1 | -0.162* | 0.024 | 0.000 | -0.222 | -0.102 |
|           |   | 2 | -0.295* | 0.027 | 0.000 | -0.365 | -0.226 |
| EVlavmax  | 1 | 2 | -0.128* | 0.027 | 0.000 | -0.196 | -0.060 |
|           |   | 3 | 0.175*  | 0.024 | 0.000 | 0.115  | 0.235  |
|           | 2 | 1 | 0.128*  | 0.027 | 0.000 | 0.060  | 0.196  |
|           |   | 3 | 0.303*  | 0.028 | 0.000 | 0.233  | 0.373  |
|           | 3 | 1 | -0.175* | 0.024 | 0.000 | -0.235 | -0.115 |
|           |   | 2 | -0.303* | 0.028 | 0.000 | -0.373 | -0.233 |
| EVlavmin  | 1 | 2 | -0.130* | 0.028 | 0.000 | -0.200 | -0.059 |
|           |   | 3 | 0.183*  | 0.025 | 0.000 | 0.120  | 0.245  |
|           | 2 | 1 | 0.130*  | 0.028 | 0.000 | 0.059  | 0.200  |
|           |   | 3 | 0.312*  | 0.029 | 0.000 | 0.240  | 0.385  |
|           | 3 | 1 | -0.183* | 0.025 | 0.000 | -0.245 | -0.120 |
|           |   | 2 | -0.312* | 0.029 | 0.000 | -0.385 | -0.240 |
| EVImaxav  | 1 | 2 | -0.125* | 0.027 | 0.000 | -0.194 | -0.057 |
|           |   | 3 | 0.197*  | 0.024 | 0.000 | 0.136  | 0.257  |
|           | 2 | 1 | 0.125*  | 0.027 | 0.000 | 0.057  | 0.194  |
|           |   | 3 | 0.322*  | 0.028 | 0.000 | 0.252  | 0.392  |
|           | 3 | 1 | -0.197* | 0.024 | 0.000 | -0.257 | -0.136 |
|           |   | 2 | -0.322* | 0.028 | 0.000 | -0.392 | -0.252 |
| EVIminav  | 1 | 2 | -0.134* | 0.027 | 0.000 | -0.203 | -0.065 |
|           |   | 3 | 0.165*  | 0.024 | 0.000 | 0.105  | 0.226  |
|           | 2 | 1 | 0.134*  | 0.027 | 0.000 | 0.065  | 0.203  |
|           |   | 3 | 0.299*  | 0.028 | 0.000 | 0.229  | 0.370  |
|           | 3 | 1 | -0.165* | 0.024 | 0.000 | -0.226 | -0.105 |
|           |   | 2 | -0.299* | 0.028 | 0.000 | -0.370 | -0.229 |
| EVledmax  | 1 | 2 | -0.049* | 0.009 | 0.000 | -0.071 | -0.027 |
|           |   | 3 | 0.071*  | 0.008 | 0.000 | 0.052  | 0.091  |
|           | 2 | 1 | 0.049*  | 0.009 | 0.000 | 0.027  | 0.071  |
|           |   | 3 | 0.121*  | 0.009 | 0.000 | 0.098  | 0.143  |
|           | 3 | 1 | -0.071* | 0.008 | 0.000 | -0.091 | -0.052 |
|           |   | 2 | -0.121* | 0.009 | 0.000 | -0.143 | -0.098 |
| EVledmin  | 1 | 2 | -0.057* | 0.009 | 0.000 | -0.080 | -0.035 |
|           |   | 3 | 0.043*  | 0.008 | 0.000 | 0.023  | 0.063  |
|           | 2 | 1 | 0.057*  | 0.009 | 0.000 | 0.035  | 0.080  |
|           |   | 3 | 0.100*  | 0.009 | 0.000 | 0.077  | 0.124  |
|           | 3 | 1 | -0.043* | 0.008 | 0.000 | -0.063 | -0.023 |
|           |   | 2 | -0.100* | 0.009 | 0.000 | -0.124 | -0.077 |

|            |   |   |         |       |       |        |        |
|------------|---|---|---------|-------|-------|--------|--------|
| EVIedav    | 1 | 2 | -0.053* | 0.009 | 0.000 | -0.075 | -0.030 |
|            |   | 3 | 0.054*  | 0.008 | 0.000 | 0.034  | 0.075  |
|            | 2 | 1 | 0.053*  | 0.009 | 0.000 | 0.030  | 0.075  |
|            |   | 3 | 0.107*  | 0.009 | 0.000 | 0.084  | 0.130  |
|            | 3 | 1 | -0.054* | 0.008 | 0.000 | -0.075 | -0.034 |
|            |   | 2 | -0.107* | 0.009 | 0.000 | -0.130 | -0.084 |
| SAVImax    | 1 | 2 | -0.104* | 0.023 | 0.000 | -0.162 | -0.046 |
|            |   | 3 | 0.148*  | 0.020 | 0.000 | 0.097  | 0.200  |
|            | 2 | 1 | 0.104*  | 0.023 | 0.000 | 0.046  | 0.162  |
|            |   | 3 | 0.253*  | 0.024 | 0.000 | 0.193  | 0.312  |
|            | 3 | 1 | -0.148* | 0.020 | 0.000 | -0.200 | -0.097 |
|            |   | 2 | -0.253* | 0.024 | 0.000 | -0.312 | -0.193 |
| SAVImin    | 1 | 2 | -0.115* | 0.025 | 0.000 | -0.177 | -0.053 |
|            |   | 3 | 0.160*  | 0.022 | 0.000 | 0.105  | 0.215  |
|            | 2 | 1 | 0.115*  | 0.025 | 0.000 | 0.053  | 0.177  |
|            |   | 3 | 0.274*  | 0.025 | 0.000 | 0.211  | 0.338  |
|            | 3 | 1 | -0.160* | 0.022 | 0.000 | -0.215 | -0.105 |
|            |   | 2 | -0.274* | 0.025 | 0.000 | -0.338 | -0.211 |
| SAVIav     | 1 | 2 | -0.108* | 0.024 | 0.000 | -0.168 | -0.048 |
|            |   | 3 | 0.151*  | 0.021 | 0.000 | 0.098  | 0.205  |
|            | 2 | 1 | 0.108*  | 0.024 | 0.000 | 0.048  | 0.168  |
|            |   | 3 | 0.260*  | 0.024 | 0.000 | 0.198  | 0.322  |
|            | 3 | 1 | -0.151* | 0.021 | 0.000 | -0.205 | -0.098 |
|            |   | 2 | -0.260* | 0.024 | 0.000 | -0.322 | -0.198 |
| SAVImaxmin | 1 | 2 | -0.104* | 0.024 | 0.000 | -0.163 | -0.044 |
|            |   | 3 | 0.154*  | 0.021 | 0.000 | 0.101  | 0.207  |
|            | 2 | 1 | 0.104*  | 0.024 | 0.000 | 0.044  | 0.163  |
|            |   | 3 | 0.257*  | 0.024 | 0.000 | 0.196  | 0.319  |
|            | 3 | 1 | -0.154* | 0.021 | 0.000 | -0.207 | -0.101 |
|            |   | 2 | -0.257* | 0.024 | 0.000 | -0.319 | -0.196 |
| SAVIminmax | 1 | 2 | -0.115* | 0.024 | 0.000 | -0.176 | -0.055 |
|            |   | 3 | 0.154*  | 0.021 | 0.000 | 0.101  | 0.208  |
|            | 2 | 1 | 0.115*  | 0.024 | 0.000 | 0.055  | 0.176  |
|            |   | 3 | 0.269*  | 0.025 | 0.000 | 0.207  | 0.332  |
|            | 3 | 1 | -0.154* | 0.021 | 0.000 | -0.208 | -0.101 |
|            |   | 2 | -0.269* | 0.025 | 0.000 | -0.332 | -0.207 |
| SAVIavmax  | 1 | 2 | -0.109* | 0.024 | 0.000 | -0.169 | -0.049 |
|            |   | 3 | 0.150*  | 0.021 | 0.000 | 0.097  | 0.203  |
|            | 2 | 1 | 0.109*  | 0.024 | 0.000 | 0.049  | 0.169  |
|            |   | 3 | 0.258*  | 0.024 | 0.000 | 0.197  | 0.320  |
|            | 3 | 1 | -0.150* | 0.021 | 0.000 | -0.203 | -0.097 |
|            |   | 2 | -0.258* | 0.024 | 0.000 | -0.320 | -0.197 |
| SAVIavmin  | 1 | 2 | -0.108* | 0.024 | 0.000 | -0.170 | -0.047 |
|            |   | 3 | 0.155*  | 0.022 | 0.000 | 0.100  | 0.209  |
|            | 2 | 1 | 0.108*  | 0.024 | 0.000 | 0.047  | 0.170  |
|            |   | 3 | 0.263*  | 0.025 | 0.000 | 0.200  | 0.326  |
|            | 3 | 1 | -0.155* | 0.022 | 0.000 | -0.209 | -0.100 |
|            |   | 2 | -0.263* | 0.025 | 0.000 | -0.326 | -0.200 |

|            |   |   |         |       |       |        |        |
|------------|---|---|---------|-------|-------|--------|--------|
| SAVImaxav  | 1 | 2 | -0.104* | 0.023 | 0.000 | -0.162 | -0.045 |
|            |   | 3 | 0.150*  | 0.020 | 0.000 | 0.098  | 0.202  |
|            | 2 | 1 | 0.104*  | 0.023 | 0.000 | 0.045  | 0.162  |
|            |   | 3 | 0.254*  | 0.024 | 0.000 | 0.194  | 0.314  |
|            | 3 | 1 | -0.150* | 0.020 | 0.000 | -0.202 | -0.098 |
|            |   | 2 | -0.254* | 0.024 | 0.000 | -0.314 | -0.194 |
| SAVIminav  | 1 | 2 | -0.115* | 0.024 | 0.000 | -0.176 | -0.054 |
|            |   | 3 | 0.156*  | 0.021 | 0.000 | 0.102  | 0.210  |
|            | 2 | 1 | 0.115*  | 0.024 | 0.000 | 0.054  | 0.176  |
|            |   | 3 | 0.271*  | 0.025 | 0.000 | 0.208  | 0.333  |
|            | 3 | 1 | -0.156* | 0.021 | 0.000 | -0.210 | -0.102 |
|            |   | 2 | -0.271* | 0.025 | 0.000 | -0.333 | -0.208 |
| SAVledgmax | 1 | 2 | -0.047* | 0.008 | 0.000 | -0.069 | -0.026 |
|            |   | 3 | 0.040*  | 0.007 | 0.000 | 0.021  | 0.059  |
|            | 2 | 1 | 0.047*  | 0.008 | 0.000 | 0.026  | 0.069  |
|            |   | 3 | 0.088*  | 0.009 | 0.000 | 0.066  | 0.109  |
|            | 3 | 1 | -0.040* | 0.007 | 0.000 | -0.059 | -0.021 |
|            |   | 2 | -0.088* | 0.009 | 0.000 | -0.109 | -0.066 |
| SAVledgmin | 1 | 2 | -0.057* | 0.009 | 0.000 | -0.080 | -0.034 |
|            |   | 3 | 0.044*  | 0.008 | 0.000 | 0.024  | 0.064  |
|            | 2 | 1 | 0.057*  | 0.009 | 0.000 | 0.034  | 0.080  |
|            |   | 3 | 0.101*  | 0.009 | 0.000 | 0.077  | 0.124  |
|            | 3 | 1 | -0.044* | 0.008 | 0.000 | -0.064 | -0.024 |
|            |   | 2 | -0.101* | 0.009 | 0.000 | -0.124 | -0.077 |
| SAVledav   | 1 | 2 | -0.052* | 0.009 | 0.000 | -0.074 | -0.029 |
|            |   | 3 | 0.040*  | 0.008 | 0.000 | 0.020  | 0.060  |
|            | 2 | 1 | 0.052*  | 0.009 | 0.000 | 0.029  | 0.074  |
|            |   | 3 | 0.092*  | 0.009 | 0.000 | 0.069  | 0.115  |
|            | 3 | 1 | -0.040* | 0.008 | 0.000 | -0.060 | -0.020 |
|            |   | 2 | -0.092* | 0.009 | 0.000 | -0.115 | -0.069 |

\*The mean difference is significant at the 0.05 level.

<sup>1</sup> Soil types are given as following: 1 – grey forest soil, 2 – alluvial soil, 3 – chernozem.

**Table S9.** Results of post hoc analysis for *shooting stage*: multiple comparisons using Sheffe criterion (ANOVA results, supporting **subsection 3.4.2.** of original manuscript)

| Dependent variable | (I) Soil type <sup>1</sup> | (J) Soil type <sup>1</sup> | Mean difference (I-J) | Standard error | p-value | 95% confidence interval |             |
|--------------------|----------------------------|----------------------------|-----------------------|----------------|---------|-------------------------|-------------|
|                    |                            |                            |                       |                |         | Lower bound             | Upper bound |
| NDVImax            | 1                          | 2                          | -0.050*               | 0.015          | 0.011   | -0.090                  | -0.011      |
|                    |                            | 3                          | -0.018                | 0.012          | 0.328   | -0.048                  | 0.013       |
|                    | 2                          | 1                          | 0.050*                | 0.015          | 0.011   | 0.011                   | 0.090       |
|                    |                            | 3                          | 0.032                 | 0.015          | 0.108   | -0.006                  | 0.070       |
|                    | 3                          | 1                          | 0.018                 | 0.012          | 0.328   | -0.013                  | 0.048       |
|                    |                            | 2                          | -0.032                | 0.015          | 0.108   | -0.070                  | 0.006       |
| NDVImin            | 1                          | 2                          | -0.033*               | 0.012          | 0.042   | -0.066                  | -0.001      |
|                    |                            | 3                          | 0.002                 | 0.010          | 0.981   | -0.023                  | 0.027       |
|                    | 2                          | 1                          | 0.033*                | 0.012          | 0.042   | 0.001                   | 0.066       |
|                    |                            | 3                          | 0.035*                | 0.012          | 0.024   | 0.004                   | 0.066       |
|                    | 3                          | 1                          | -0.002                | 0.010          | 0.981   | -0.027                  | 0.023       |
|                    |                            | 2                          | -0.035*               | 0.012          | 0.024   | -0.066                  | -0.004      |
| NDVIav             | 1                          | 2                          | -0.042*               | 0.014          | 0.020   | -0.079                  | -0.006      |
|                    |                            | 3                          | -0.008                | 0.011          | 0.750   | -0.036                  | 0.020       |
|                    | 2                          | 1                          | 0.042*                | 0.014          | 0.020   | 0.006                   | 0.079       |
|                    |                            | 3                          | 0.034                 | 0.013          | 0.057   | -0.001                  | 0.069       |
|                    | 3                          | 1                          | 0.008                 | 0.011          | 0.750   | -0.020                  | 0.036       |
|                    |                            | 2                          | -0.034                | 0.013          | 0.057   | -0.069                  | 0.001       |
| NDVImaxmin         | 1                          | 2                          | -0.033*               | 0.012          | 0.043   | -0.064                  | -0.001      |
|                    |                            | 3                          | 0.002                 | 0.009          | 0.984   | -0.023                  | 0.026       |
|                    | 2                          | 1                          | 0.033*                | 0.012          | 0.043   | 0.001                   | 0.064       |
|                    |                            | 3                          | 0.034*                | 0.012          | 0.025   | 0.004                   | 0.065       |
|                    | 3                          | 1                          | -0.002                | 0.009          | 0.984   | -0.026                  | 0.023       |
|                    |                            | 2                          | -0.034*               | 0.012          | 0.025   | -0.065                  | -0.004      |
| NDVIminmax         | 1                          | 2                          | -0.051*               | 0.016          | 0.011   | -0.092                  | -0.011      |
|                    |                            | 3                          | -0.018                | 0.012          | 0.330   | -0.049                  | 0.013       |
|                    | 2                          | 1                          | 0.051*                | 0.016          | 0.011   | 0.011                   | 0.092       |
|                    |                            | 3                          | 0.033                 | 0.015          | 0.108   | -0.006                  | 0.072       |
|                    | 3                          | 1                          | 0.018                 | 0.012          | 0.330   | -0.013                  | 0.049       |
|                    |                            | 2                          | -0.033                | 0.015          | 0.108   | -0.072                  | 0.006       |
| NDVIavmax          | 1                          | 2                          | -0.051*               | 0.015          | 0.011   | -0.091                  | -0.011      |
|                    |                            | 3                          | -0.018                | 0.012          | 0.318   | -0.049                  | 0.012       |
|                    | 2                          | 1                          | 0.051*                | 0.015          | 0.011   | 0.011                   | 0.091       |
|                    |                            | 3                          | 0.033                 | 0.015          | 0.110   | -0.006                  | 0.071       |
|                    | 3                          | 1                          | 0.018                 | 0.012          | 0.318   | -0.012                  | 0.049       |
|                    |                            | 2                          | -0.033                | 0.015          | 0.110   | -0.071                  | 0.006       |
| NDVIavmin          | 1                          | 2                          | -0.033*               | 0.012          | 0.042   | -0.065                  | -0.001      |
|                    |                            | 3                          | 0.001                 | 0.009          | 0.988   | -0.023                  | 0.026       |
|                    | 2                          | 1                          | 0.033*                | 0.012          | 0.042   | 0.001                   | 0.065       |
|                    |                            | 3                          | 0.035*                | 0.012          | 0.025   | 0.004                   | 0.065       |
|                    | 3                          | 1                          | -0.001                | 0.009          | 0.988   | -0.026                  | 0.023       |
|                    |                            | 2                          | -0.035*               | 0.012          | 0.025   | -0.065                  | -0.004      |

|           |   |   |         |       |       |        |        |
|-----------|---|---|---------|-------|-------|--------|--------|
| NDVImaxav | 1 | 2 | -0.042* | 0.014 | 0.021 | -0.078 | -0.006 |
|           |   | 3 | -0.008  | 0.011 | 0.763 | -0.035 | 0.020  |
|           | 2 | 1 | 0.042*  | 0.014 | 0.021 | 0.006  | 0.078  |
|           |   | 3 | 0.034   | 0.013 | 0.056 | -0.001 | 0.068  |
|           | 3 | 1 | 0.008   | 0.011 | 0.763 | -0.020 | 0.035  |
|           |   | 2 | -0.034  | 0.013 | 0.056 | -0.068 | 0.001  |
| NDVIminav | 1 | 2 | -0.043* | 0.014 | 0.021 | -0.079 | -0.006 |
|           |   | 3 | -0.008  | 0.011 | 0.768 | -0.036 | 0.020  |
|           | 2 | 1 | 0.043*  | 0.014 | 0.021 | 0.006  | 0.079  |
|           |   | 3 | 0.035   | 0.014 | 0.055 | -0.001 | 0.070  |
|           | 3 | 1 | 0.008   | 0.011 | 0.768 | -0.020 | 0.036  |
|           |   | 2 | -0.035  | 0.014 | 0.055 | -0.070 | 0.001  |
| NDVIedmax | 1 | 2 | -0.096* | 0.022 | 0.001 | -0.154 | -0.038 |
|           |   | 3 | -0.049* | 0.017 | 0.027 | -0.094 | -0.005 |
|           | 2 | 1 | 0.096*  | 0.022 | 0.001 | 0.038  | 0.154  |
|           |   | 3 | 0.047   | 0.021 | 0.111 | -0.009 | 0.103  |
|           | 3 | 1 | 0.049*  | 0.017 | 0.027 | 0.005  | 0.094  |
|           |   | 2 | -0.047  | 0.021 | 0.111 | -0.103 | 0.009  |
| NDVIedmin | 1 | 2 | -0.095* | 0.022 | 0.001 | -0.152 | -0.038 |
|           |   | 3 | -0.049* | 0.017 | 0.026 | -0.093 | -0.005 |
|           | 2 | 1 | 0.095*  | 0.022 | 0.001 | 0.038  | 0.152  |
|           |   | 3 | 0.046   | 0.021 | 0.116 | -0.009 | 0.101  |
|           | 3 | 1 | 0.049*  | 0.017 | 0.026 | 0.005  | 0.093  |
|           |   | 2 | -0.046  | 0.021 | 0.116 | -0.101 | 0.009  |
| NDVIedav  | 1 | 2 | -0.097* | 0.022 | 0.001 | -0.156 | -0.039 |
|           |   | 3 | -0.050* | 0.017 | 0.025 | -0.095 | -0.006 |
|           | 2 | 1 | 0.097*  | 0.022 | 0.001 | 0.039  | 0.156  |
|           |   | 3 | 0.047   | 0.022 | 0.115 | -0.009 | 0.103  |
|           | 3 | 1 | 0.050*  | 0.017 | 0.025 | 0.006  | 0.095  |
|           |   | 2 | -0.047  | 0.022 | 0.115 | -0.103 | 0.009  |
| EVIImax   | 1 | 2 | -0.062  | 0.039 | 0.369 | -0.162 | 0.038  |
|           |   | 3 | 0.138*  | 0.030 | 0.000 | 0.062  | 0.215  |
|           | 2 | 1 | 0.062   | 0.039 | 0.369 | -0.038 | 0.162  |
|           |   | 3 | 0.201*  | 0.037 | 0.000 | 0.105  | 0.297  |
|           | 3 | 1 | -0.138* | 0.030 | 0.000 | -0.215 | -0.062 |
|           |   | 2 | -0.201* | 0.037 | 0.000 | -0.297 | -0.105 |
| EVIImin   | 1 | 2 | -0.045  | 0.039 | 0.787 | -0.146 | 0.056  |
|           |   | 3 | 0.160*  | 0.030 | 0.000 | 0.083  | 0.238  |
|           | 2 | 1 | 0.045   | 0.039 | 0.787 | -0.056 | 0.146  |
|           |   | 3 | 0.205*  | 0.038 | 0.000 | 0.109  | 0.302  |
|           | 3 | 1 | -0.160* | 0.030 | 0.000 | -0.238 | -0.083 |
|           |   | 2 | -0.205* | 0.038 | 0.000 | -0.302 | -0.109 |
| EVIav     | 1 | 2 | -0.056  | 0.039 | 0.486 | -0.157 | 0.044  |
|           |   | 3 | 0.149*  | 0.030 | 0.000 | 0.072  | 0.226  |
|           | 2 | 1 | 0.056   | 0.039 | 0.486 | -0.044 | 0.157  |
|           |   | 3 | 0.205*  | 0.038 | 0.000 | 0.109  | 0.302  |
|           | 3 | 1 | -0.149* | 0.030 | 0.000 | -0.226 | -0.072 |
|           |   | 2 | -0.205* | 0.038 | 0.000 | -0.302 | -0.109 |

|           |   |   |         |       |       |        |        |
|-----------|---|---|---------|-------|-------|--------|--------|
| EVImaxmin | 1 | 2 | -0.050  | 0.039 | 0.653 | -0.150 | 0.051  |
|           |   | 3 | 0.162*  | 0.030 | 0.000 | 0.085  | 0.239  |
|           | 2 | 1 | 0.050   | 0.039 | 0.653 | -0.051 | 0.150  |
|           |   | 3 | 0.212*  | 0.038 | 0.000 | 0.115  | 0.308  |
|           | 3 | 1 | -0.162* | 0.030 | 0.000 | -0.239 | -0.085 |
|           |   | 2 | -0.212* | 0.038 | 0.000 | -0.308 | -0.115 |
| EVIminmax | 1 | 2 | -0.058  | 0.039 | 0.455 | -0.157 | 0.042  |
|           |   | 3 | 0.137*  | 0.030 | 0.000 | 0.060  | 0.213  |
|           | 2 | 1 | 0.058   | 0.039 | 0.455 | -0.042 | 0.157  |
|           |   | 3 | 0.194*  | 0.037 | 0.000 | 0.098  | 0.290  |
|           | 3 | 1 | -0.137* | 0.030 | 0.000 | -0.213 | -0.060 |
|           |   | 2 | -0.194* | 0.037 | 0.000 | -0.290 | -0.098 |
| EVIavmax  | 1 | 2 | -0.063  | 0.039 | 0.364 | -0.163 | 0.038  |
|           |   | 3 | 0.137*  | 0.030 | 0.000 | 0.060  | 0.214  |
|           | 2 | 1 | 0.063   | 0.039 | 0.364 | -0.038 | 0.163  |
|           |   | 3 | 0.199*  | 0.038 | 0.000 | 0.103  | 0.295  |
|           | 3 | 1 | -0.137* | 0.030 | 0.000 | -0.214 | -0.060 |
|           |   | 2 | -0.199* | 0.038 | 0.000 | -0.295 | -0.103 |
| EVIavmin  | 1 | 2 | -0.050  | 0.039 | 0.644 | -0.151 | 0.051  |
|           |   | 3 | 0.160*  | 0.030 | 0.000 | 0.083  | 0.237  |
|           | 2 | 1 | 0.050   | 0.039 | 0.644 | -0.051 | 0.151  |
|           |   | 3 | 0.210*  | 0.038 | 0.000 | 0.113  | 0.307  |
|           | 3 | 1 | -0.160* | 0.030 | 0.000 | -0.237 | -0.083 |
|           |   | 2 | -0.210* | 0.038 | 0.000 | -0.307 | -0.113 |
| EVImaxav  | 1 | 2 | -0.056  | 0.039 | 0.493 | -0.157 | 0.044  |
|           |   | 3 | 0.151*  | 0.030 | 0.000 | 0.074  | 0.228  |
|           | 2 | 1 | 0.056   | 0.039 | 0.493 | -0.044 | 0.157  |
|           |   | 3 | 0.207*  | 0.038 | 0.000 | 0.110  | 0.303  |
|           | 3 | 1 | -0.151* | 0.030 | 0.000 | -0.228 | -0.074 |
|           |   | 2 | -0.207* | 0.038 | 0.000 | -0.303 | -0.110 |
| EVIminav  | 1 | 2 | -0.051  | 0.039 | 0.601 | -0.152 | 0.049  |
|           |   | 3 | 0.149*  | 0.030 | 0.000 | 0.072  | 0.226  |
|           | 2 | 1 | 0.051   | 0.039 | 0.601 | -0.049 | 0.152  |
|           |   | 3 | 0.200*  | 0.038 | 0.000 | 0.104  | 0.297  |
|           | 3 | 1 | -0.149* | 0.030 | 0.000 | -0.226 | -0.072 |
|           |   | 2 | -0.200* | 0.038 | 0.000 | -0.297 | -0.104 |
| EVIedmax  | 1 | 2 | -0.092* | 0.026 | 0.004 | -0.159 | -0.026 |
|           |   | 3 | 0.012   | 0.020 | 1.000 | -0.039 | 0.063  |
|           | 2 | 1 | 0.092*  | 0.026 | 0.004 | 0.026  | 0.159  |
|           |   | 3 | 0.105*  | 0.025 | 0.001 | 0.041  | 0.168  |
|           | 3 | 1 | -0.012  | 0.020 | 1.000 | -0.063 | 0.039  |
|           |   | 2 | -0.105* | 0.025 | 0.001 | -0.168 | -0.041 |
| EVIedmin  | 1 | 2 | -0.087* | 0.025 | 0.006 | -0.152 | -0.023 |
|           |   | 3 | 0.011   | 0.019 | 1.000 | -0.039 | 0.060  |
|           | 2 | 1 | 0.087*  | 0.025 | 0.006 | 0.023  | 0.152  |
|           |   | 3 | 0.098*  | 0.024 | 0.001 | 0.036  | 0.160  |
|           | 3 | 1 | -0.011  | 0.019 | 1.000 | -0.060 | 0.039  |
|           |   | 2 | -0.098* | 0.024 | 0.001 | -0.160 | -0.036 |



|            |   |   |         |       |       |        |        |
|------------|---|---|---------|-------|-------|--------|--------|
| EVIedav    | 1 | 2 | -0.093* | 0.026 | 0.004 | -0.159 | -0.026 |
|            |   | 3 | 0.011   | 0.020 | 1.000 | -0.040 | 0.061  |
|            | 2 | 1 | 0.093*  | 0.026 | 0.004 | 0.026  | 0.159  |
|            |   | 3 | 0.103*  | 0.025 | 0.001 | 0.039  | 0.167  |
|            | 3 | 1 | -0.011  | 0.020 | 1.000 | -0.061 | 0.040  |
|            |   | 2 | -0.103* | 0.025 | 0.001 | -0.167 | -0.039 |
| SAVImax    | 1 | 2 | -0.047  | 0.029 | 0.359 | -0.122 | 0.028  |
|            |   | 3 | 0.100*  | 0.022 | 0.000 | 0.042  | 0.157  |
|            | 2 | 1 | 0.047   | 0.029 | 0.359 | -0.028 | 0.122  |
|            |   | 3 | 0.147*  | 0.028 | 0.000 | 0.075  | 0.219  |
|            | 3 | 1 | -0.100* | 0.022 | 0.000 | -0.157 | -0.042 |
|            |   | 2 | -0.147* | 0.028 | 0.000 | -0.219 | -0.075 |
| SAVImin    | 1 | 2 | -0.034  | 0.029 | 0.764 | -0.109 | 0.041  |
|            |   | 3 | 0.117*  | 0.022 | 0.000 | 0.059  | 0.174  |
|            | 2 | 1 | 0.034   | 0.029 | 0.764 | -0.041 | 0.109  |
|            |   | 3 | 0.151*  | 0.028 | 0.000 | 0.079  | 0.223  |
|            | 3 | 1 | -0.117* | 0.022 | 0.000 | -0.174 | -0.059 |
|            |   | 2 | -0.151* | 0.028 | 0.000 | -0.223 | -0.079 |
| SAVIav     | 1 | 2 | -0.042  | 0.029 | 0.477 | -0.117 | 0.032  |
|            |   | 3 | 0.108*  | 0.022 | 0.000 | 0.050  | 0.165  |
|            | 2 | 1 | 0.042   | 0.029 | 0.477 | -0.032 | 0.117  |
|            |   | 3 | 0.150*  | 0.028 | 0.000 | 0.078  | 0.222  |
|            | 3 | 1 | -0.108* | 0.022 | 0.000 | -0.165 | -0.050 |
|            |   | 2 | -0.150* | 0.028 | 0.000 | -0.222 | -0.078 |
| SAVImaxmin | 1 | 2 | -0.037  | 0.029 | 0.645 | -0.111 | 0.037  |
|            |   | 3 | 0.117*  | 0.022 | 0.000 | 0.060  | 0.173  |
|            | 2 | 1 | 0.037   | 0.029 | 0.645 | -0.037 | 0.111  |
|            |   | 3 | 0.153*  | 0.028 | 0.000 | 0.082  | 0.224  |
|            | 3 | 1 | -0.117* | 0.022 | 0.000 | -0.173 | -0.060 |
|            |   | 2 | -0.153* | 0.028 | 0.000 | -0.224 | -0.082 |
| SAVIminmax | 1 | 2 | -0.044  | 0.030 | 0.434 | -0.120 | 0.031  |
|            |   | 3 | 0.100*  | 0.023 | 0.001 | 0.042  | 0.158  |
|            | 2 | 1 | 0.044   | 0.030 | 0.434 | -0.031 | 0.120  |
|            |   | 3 | 0.144*  | 0.028 | 0.000 | 0.072  | 0.217  |
|            | 3 | 1 | -0.100* | 0.023 | 0.001 | -0.158 | -0.042 |
|            |   | 2 | -0.144* | 0.028 | 0.000 | -0.217 | -0.072 |
| SAVIavmax  | 1 | 2 | -0.048  | 0.029 | 0.354 | -0.123 | 0.028  |
|            |   | 3 | 0.099*  | 0.023 | 0.001 | 0.041  | 0.157  |
|            | 2 | 1 | 0.048   | 0.029 | 0.354 | -0.028 | 0.123  |
|            |   | 3 | 0.146*  | 0.028 | 0.000 | 0.074  | 0.219  |
|            | 3 | 1 | -0.099* | 0.023 | 0.001 | -0.157 | -0.041 |
|            |   | 2 | -0.146* | 0.028 | 0.000 | -0.219 | -0.074 |
| SAVIavmin  | 1 | 2 | -0.037  | 0.029 | 0.636 | -0.111 | 0.037  |
|            |   | 3 | 0.116*  | 0.022 | 0.000 | 0.059  | 0.173  |
|            | 2 | 1 | 0.037   | 0.029 | 0.636 | -0.037 | 0.111  |
|            |   | 3 | .153*   | 0.028 | 0.000 | 0.081  | 0.224  |
|            | 3 | 1 | -0.116* | 0.022 | 0.000 | -0.173 | -0.059 |
|            |   | 2 | -0.153* | 0.028 | 0.000 | -0.224 | -0.081 |

|           |   |   |         |       |       |        |        |
|-----------|---|---|---------|-------|-------|--------|--------|
| SAVImaxav | 1 | 2 | -0.042  | 0.029 | 0.484 | -0.116 | 0.033  |
|           |   | 3 | 0.109*  | 0.022 | 0.000 | 0.051  | 0.166  |
|           | 2 | 1 | 0.042   | 0.029 | 0.484 | -0.033 | 0.116  |
|           |   | 3 | 0.151*  | 0.028 | 0.000 | 0.079  | 0.222  |
|           | 3 | 1 | -0.109* | 0.022 | 0.000 | -0.166 | -0.051 |
|           |   | 2 | -0.151* | 0.028 | 0.000 | -0.222 | -0.079 |
| SAVIminav | 1 | 2 | -0.039  | 0.029 | 0.579 | -0.115 | 0.036  |
|           |   | 3 | 0.109*  | 0.023 | 0.000 | 0.051  | 0.167  |
|           | 2 | 1 | 0.039   | 0.029 | 0.579 | -0.036 | 0.115  |
|           |   | 3 | 0.148*  | 0.028 | 0.000 | 0.076  | 0.220  |
|           | 3 | 1 | -0.109* | 0.023 | 0.000 | -0.167 | -0.051 |
|           |   | 2 | -0.148* | 0.028 | 0.000 | -0.220 | -0.076 |
| SAViedmax | 1 | 2 | -0.085* | 0.024 | 0.005 | -0.146 | -0.024 |
|           |   | 3 | 0.007   | 0.018 | 1.000 | -0.040 | 0.054  |
|           | 2 | 1 | 0.085*  | 0.024 | 0.005 | 0.024  | 0.146  |
|           |   | 3 | 0.092*  | 0.023 | 0.001 | 0.033  | 0.150  |
|           | 3 | 1 | -0.007  | 0.018 | 1.000 | -0.054 | 0.040  |
|           |   | 2 | -0.092* | 0.023 | 0.001 | -0.150 | -0.033 |
| SAViedmin | 1 | 2 | -0.081* | 0.023 | 0.006 | -0.142 | -0.021 |
|           |   | 3 | 0.006   | 0.018 | 1.000 | -0.041 | 0.052  |
|           | 2 | 1 | 0.081*  | 0.023 | 0.006 | 0.021  | 0.142  |
|           |   | 3 | 0.087*  | 0.022 | 0.002 | 0.029  | 0.145  |
|           | 3 | 1 | -0.006  | 0.018 | 1.000 | -0.052 | 0.041  |
|           |   | 2 | -0.087* | 0.022 | 0.002 | -0.145 | -0.029 |
| SAViedav  | 1 | 2 | -0.085* | 0.024 | 0.004 | -0.147 | -0.024 |
|           |   | 3 | 0.005   | 0.018 | 1.000 | -0.042 | 0.052  |
|           | 2 | 1 | 0.085*  | 0.024 | 0.004 | 0.024  | 0.147  |
|           |   | 3 | 0.091*  | 0.023 | 0.002 | 0.032  | 0.149  |
|           | 3 | 1 | -0.005  | 0.018 | 1.000 | -0.052 | 0.042  |
|           |   | 2 | -0.091* | 0.023 | 0.002 | -0.149 | -0.032 |

\*The mean difference is significant at the 0.05 level.

<sup>1</sup> Soil types are given as following: 1 – grey forest soil, 2 – alluvial soil, 3 – chernozem.

**Table S10.** Results of post hoc analysis for *milky ripeness stage*: multiple comparisons using Sheffe criterion (ANOVA results, supporting **subsection 3.4.3.** of original manuscript)

| Dependent variable | (I) soil type <sup>1</sup> | (J) soil type <sup>1</sup> | Mean difference (I-J) | Standard error | p-value | 95% confidence interval |             |
|--------------------|----------------------------|----------------------------|-----------------------|----------------|---------|-------------------------|-------------|
|                    |                            |                            |                       |                |         | Lower bound             | Upper bound |
| NDVImax            | 1                          | 2                          | -0.135*               | 0.047          | 0.032   | -0.259                  | -0.010      |
|                    |                            | 3                          | -0.167*               | 0.037          | 0.001   | -0.264                  | -0.071      |
|                    | 2                          | 1                          | 0.135*                | 0.047          | 0.032   | 0.010                   | 0.259       |
|                    |                            | 3                          | -0.033                | 0.048          | 0.793   | -0.159                  | 0.094       |
|                    | 3                          | 1                          | 0.167*                | 0.037          | 0.001   | 0.071                   | 0.264       |
|                    |                            | 2                          | 0.033                 | 0.048          | 0.793   | -0.094                  | 0.159       |
| NDVImin            | 1                          | 2                          | -0.174*               | 0.051          | 0.010   | -0.309                  | -0.039      |
|                    |                            | 3                          | -0.174*               | 0.040          | 0.001   | -0.278                  | -0.069      |
|                    | 2                          | 1                          | 0.174*                | 0.051          | 0.010   | 0.039                   | 0.309       |
|                    |                            | 3                          | 0.000                 | 0.052          | 1.000   | -0.137                  | 0.137       |
|                    | 3                          | 1                          | 0.174*                | 0.040          | 0.001   | 0.069                   | 0.278       |
|                    |                            | 2                          | 0.000                 | 0.052          | 1.000   | -0.137                  | 0.137       |
| NDVIav             | 1                          | 2                          | -0.148*               | 0.046          | 0.015   | -0.268                  | -0.027      |
|                    |                            | 3                          | -0.161*               | 0.035          | 0.001   | -0.255                  | -0.067      |
|                    | 2                          | 1                          | 0.148*                | 0.046          | 0.015   | 0.027                   | 0.268       |
|                    |                            | 3                          | -0.013                | 0.046          | 0.960   | -0.136                  | 0.109       |
|                    | 3                          | 1                          | 0.161*                | 0.035          | 0.001   | 0.067                   | 0.255       |
|                    |                            | 2                          | 0.013                 | 0.046          | 0.960   | -0.109                  | 0.136       |
| NDVImaxmin         | 1                          | 2                          | -0.140*               | 0.044          | 0.015   | -0.255                  | -0.025      |
|                    |                            | 3                          | -0.142*               | 0.034          | 0.002   | -0.231                  | -0.052      |
|                    | 2                          | 1                          | 0.140*                | 0.044          | 0.015   | 0.025                   | 0.255       |
|                    |                            | 3                          | -0.002                | 0.044          | 0.999   | -0.119                  | 0.115       |
|                    | 3                          | 1                          | 0.142*                | 0.034          | 0.002   | 0.052                   | 0.231       |
|                    |                            | 2                          | 0.002                 | 0.044          | 0.999   | -0.115                  | 0.119       |
| NDVIminmax         | 1                          | 2                          | -0.169*               | 0.054          | 0.020   | -0.312                  | -0.025      |
|                    |                            | 3                          | -0.203*               | 0.042          | 0.000   | -0.314                  | -0.091      |
|                    | 2                          | 1                          | 0.169*                | 0.054          | 0.020   | 0.025                   | 0.312       |
|                    |                            | 3                          | -0.034                | 0.055          | 0.828   | -0.180                  | 0.112       |
|                    | 3                          | 1                          | 0.203*                | 0.042          | 0.000   | 0.091                   | 0.314       |
|                    |                            | 2                          | 0.034                 | 0.055          | 0.828   | -0.112                  | 0.180       |
| NDVIavmax          | 1                          | 2                          | -0.148*               | 0.051          | 0.028   | -0.282                  | -0.014      |
|                    |                            | 3                          | -0.183*               | 0.039          | 0.001   | -0.287                  | -0.079      |
|                    | 2                          | 1                          | 0.148*                | 0.051          | 0.028   | 0.014                   | 0.282       |
|                    |                            | 3                          | -0.035                | 0.051          | 0.796   | -0.171                  | 0.101       |
|                    | 3                          | 1                          | 0.1831*               | 0.039          | 0.001   | 0.079                   | 0.287       |
|                    |                            | 2                          | 0.035                 | 0.051          | 0.796   | -0.101                  | 0.171       |
| NDVIavmin          | 1                          | 2                          | -0.153*               | 0.047          | 0.014   | -0.278                  | -0.029      |
|                    |                            | 3                          | -0.156*               | 0.037          | 0.002   | -0.252                  | -0.059      |
|                    | 2                          | 1                          | 0.153*                | 0.047          | 0.014   | 0.029                   | 0.278       |
|                    |                            | 3                          | -0.002                | 0.048          | 0.999   | -0.129                  | 0.124       |
|                    | 3                          | 1                          | 0.156*                | 0.037          | 0.002   | 0.059                   | 0.252       |
|                    |                            | 2                          | 0.002                 | 0.048          | 0.999   | -0.124                  | 0.129       |

|           |   |   |         |       |       |        |        |
|-----------|---|---|---------|-------|-------|--------|--------|
| NDVImaxav | 1 | 2 | -0.134* | 0.042 | 0.017 | -0.246 | -0.023 |
|           |   | 3 | -0.146* | 0.033 | 0.001 | -0.233 | -0.060 |
|           | 2 | 1 | 0.134*  | 0.042 | 0.017 | 0.023  | 0.246  |
|           |   | 3 | -0.012  | 0.043 | 0.962 | -0.125 | 0.102  |
|           | 3 | 1 | 0.146*  | 0.033 | 0.001 | 0.060  | 0.233  |
|           |   | 2 | 0.012   | 0.043 | 0.962 | -0.102 | 0.125  |
| NDVIminav | 1 | 2 | -0.168* | 0.049 | 0.010 | -0.298 | -0.037 |
|           |   | 3 | -0.179* | 0.038 | 0.001 | -0.280 | -0.078 |
|           | 2 | 1 | 0.168*  | 0.049 | 0.010 | 0.037  | 0.298  |
|           |   | 3 | -0.011  | 0.050 | 0.975 | -0.144 | 0.121  |
|           | 3 | 1 | 0.179*  | 0.038 | 0.001 | 0.078  | 0.280  |
|           |   | 2 | 0.011   | 0.050 | 0.975 | -0.121 | 0.144  |
| NDVIedmax | 1 | 2 | -0.059  | 0.028 | 0.142 | -0.133 | 0.016  |
|           |   | 3 | -0.109* | 0.022 | 0.000 | -0.167 | -0.051 |
|           | 2 | 1 | 0.059   | 0.028 | 0.142 | -0.016 | 0.133  |
|           |   | 3 | -0.051  | 0.029 | 0.233 | -0.126 | 0.025  |
|           | 3 | 1 | 0.109*  | 0.022 | 0.000 | 0.051  | 0.167  |
|           |   | 2 | 0.051   | 0.029 | 0.233 | -0.025 | 0.126  |
| NDVIedmin | 1 | 2 | -0.086* | 0.030 | 0.034 | -0.165 | -0.006 |
|           |   | 3 | -0.135* | 0.023 | 0.000 | -0.196 | -0.073 |
|           | 2 | 1 | 0.086*  | 0.030 | 0.034 | 0.006  | 0.165  |
|           |   | 3 | -0.049  | 0.031 | 0.301 | -0.130 | 0.032  |
|           | 3 | 1 | 0.135*  | 0.023 | 0.000 | 0.073  | 0.196  |
|           |   | 2 | 0.049   | 0.031 | 0.301 | -0.032 | 0.130  |
| NDVIedav  | 1 | 2 | -0.071  | 0.030 | 0.088 | -0.150 | 0.009  |
|           |   | 3 | -0.123* | 0.023 | 0.000 | -0.185 | -0.062 |
|           | 2 | 1 | 0.071   | 0.030 | 0.088 | -0.009 | 0.150  |
|           |   | 3 | -0.053  | 0.031 | 0.249 | -0.133 | 0.028  |
|           | 3 | 1 | 0.123*  | 0.023 | 0.000 | 0.062  | 0.185  |
|           |   | 2 | 0.053   | 0.031 | 0.249 | -0.028 | 0.133  |
| EVImax    | 1 | 2 | -0.181* | 0.038 | 0.000 | -0.281 | -0.081 |
|           |   | 3 | -0.176* | 0.029 | 0.000 | -0.254 | -0.099 |
|           | 2 | 1 | 0.181*  | 0.038 | 0.000 | 0.081  | 0.281  |
|           |   | 3 | 0.005   | 0.038 | 0.993 | -0.097 | 0.106  |
|           | 3 | 1 | 0.176*  | 0.029 | 0.000 | 0.099  | 0.254  |
|           |   | 2 | -0.005  | 0.038 | 0.993 | -0.106 | 0.097  |
| EVImin    | 1 | 2 | -0.200* | 0.038 | 0.000 | -0.301 | -0.100 |
|           |   | 3 | -0.171* | 0.029 | 0.000 | -0.249 | -0.093 |
|           | 2 | 1 | 0.200*  | 0.038 | 0.000 | 0.100  | 0.301  |
|           |   | 3 | 0.030   | 0.039 | 0.746 | -0.072 | 0.132  |
|           | 3 | 1 | 0.171*  | 0.029 | 0.000 | 0.093  | 0.249  |
|           |   | 2 | -0.030  | 0.039 | 0.746 | -0.132 | 0.072  |
| EVIav     | 1 | 2 | -0.192* | 0.037 | 0.000 | -0.289 | -0.094 |
|           |   | 3 | -0.173* | 0.029 | 0.000 | -0.249 | -0.098 |
|           | 2 | 1 | 0.192*  | 0.037 | 0.000 | 0.094  | 0.289  |
|           |   | 3 | 0.018   | 0.038 | 0.890 | -0.081 | 0.117  |
|           | 3 | 1 | 0.173*  | 0.029 | 0.000 | 0.098  | 0.249  |
|           |   | 2 | -0.018  | 0.038 | 0.890 | -0.117 | 0.081  |

|                       |   |   |         |       |       |        |        |
|-----------------------|---|---|---------|-------|-------|--------|--------|
| EVI <sub>maxmin</sub> | 1 | 2 | -0.196* | 0.037 | 0.000 | -0.294 | -0.098 |
|                       |   | 3 | -0.167* | 0.029 | 0.000 | -0.243 | -0.091 |
|                       | 2 | 1 | 0.196*  | 0.037 | 0.000 | 0.098  | 0.294  |
|                       |   | 3 | 0.029   | 0.038 | 0.754 | -0.071 | 0.128  |
|                       | 3 | 1 | 0.167*  | 0.029 | 0.000 | 0.091  | 0.243  |
|                       |   | 2 | -0.029  | 0.038 | 0.754 | -0.128 | 0.071  |
| EVI <sub>minmax</sub> | 1 | 2 | -0.185* | 0.038 | 0.000 | -0.287 | -0.084 |
|                       |   | 3 | -0.179* | 0.030 | 0.000 | -0.258 | -0.100 |
|                       | 2 | 1 | 0.185*  | 0.038 | 0.000 | 0.084  | 0.287  |
|                       |   | 3 | 0.006   | 0.039 | 0.989 | -0.097 | 0.109  |
|                       | 3 | 1 | 0.179*  | 0.030 | 0.000 | 0.100  | 0.258  |
|                       |   | 2 | -0.006  | 0.039 | 0.989 | -0.109 | 0.097  |
| EVI <sub>avmax</sub>  | 1 | 2 | -0.185* | 0.039 | 0.001 | -0.288 | -0.081 |
|                       |   | 3 | -0.182* | 0.030 | 0.000 | -0.262 | -0.102 |
|                       | 2 | 1 | 0.185*  | 0.039 | 0.001 | 0.081  | 0.288  |
|                       |   | 3 | 0.002   | 0.040 | 0.998 | -0.103 | 0.107  |
|                       | 3 | 1 | 0.182*  | 0.030 | 0.000 | 0.102  | 0.262  |
|                       |   | 2 | -0.002  | 0.040 | 0.998 | -0.107 | 0.103  |
| EVI <sub>avmin</sub>  | 1 | 2 | -0.199* | 0.038 | 0.000 | -0.301 | -0.098 |
|                       |   | 3 | -0.173* | 0.030 | 0.000 | -0.252 | -0.095 |
|                       | 2 | 1 | 0.199*  | 0.038 | 0.000 | 0.098  | 0.301  |
|                       |   | 3 | 0.026   | 0.039 | 0.798 | -0.077 | 0.129  |
|                       | 3 | 1 | 0.173*  | 0.030 | 0.000 | 0.095  | 0.252  |
|                       |   | 2 | -0.026  | 0.039 | 0.798 | -0.129 | 0.077  |
| EVI <sub>maxav</sub>  | 1 | 2 | -0.188* | 0.036 | 0.000 | -0.282 | -0.093 |
|                       |   | 3 | -0.167* | 0.028 | 0.000 | -0.241 | -0.094 |
|                       | 2 | 1 | 0.188*  | 0.036 | 0.000 | 0.093  | 0.282  |
|                       |   | 3 | 0.020   | 0.036 | 0.855 | -0.076 | 0.117  |
|                       | 3 | 1 | 0.167*  | 0.028 | 0.000 | 0.094  | 0.241  |
|                       |   | 2 | -0.020  | 0.036 | 0.855 | -0.117 | 0.076  |
| EVI <sub>minav</sub>  | 1 | 2 | -0.192* | 0.037 | 0.000 | -0.289 | -0.096 |
|                       |   | 3 | -0.171* | 0.028 | 0.000 | -0.246 | -0.096 |
|                       | 2 | 1 | 0.192*  | 0.037 | 0.000 | 0.096  | 0.289  |
|                       |   | 3 | 0.022   | 0.037 | 0.845 | -0.077 | 0.120  |
|                       | 3 | 1 | 0.171*  | 0.028 | 0.000 | 0.096  | 0.246  |
|                       |   | 2 | -0.022  | 0.037 | 0.845 | -0.120 | 0.077  |
| EVI <sub>edmax</sub>  | 1 | 2 | -0.076* | 0.023 | 0.012 | -0.137 | -0.016 |
|                       |   | 3 | -0.106* | 0.018 | 0.000 | -0.153 | -0.059 |
|                       | 2 | 1 | 0.076*  | 0.023 | 0.012 | 0.016  | 0.137  |
|                       |   | 3 | -0.030  | 0.023 | 0.454 | -0.091 | 0.032  |
|                       | 3 | 1 | 0.106*  | 0.018 | 0.000 | 0.059  | 0.153  |
|                       |   | 2 | 0.030   | 0.023 | 0.454 | -0.032 | 0.091  |
| EVI <sub>edmin</sub>  | 1 | 2 | -0.081* | 0.022 | 0.007 | -0.140 | -0.022 |
|                       |   | 3 | -0.109* | 0.017 | 0.000 | -0.155 | -0.063 |
|                       | 2 | 1 | 0.081*  | 0.022 | 0.007 | 0.022  | 0.140  |
|                       |   | 3 | -0.028  | 0.023 | 0.489 | -0.088 | 0.032  |
|                       | 3 | 1 | 0.109*  | 0.017 | 0.000 | 0.063  | 0.155  |
|                       |   | 2 | 0.028   | 0.023 | 0.489 | -0.032 | 0.088  |

|             |   |   |         |       |       |        |        |
|-------------|---|---|---------|-------|-------|--------|--------|
| EVIedav     | 1 | 2 | -0.080* | 0.024 | 0.011 | -0.142 | -0.017 |
|             |   | 3 | -0.111* | 0.018 | 0.000 | -0.160 | -0.063 |
|             | 2 | 1 | 0.080*  | 0.024 | 0.011 | 0.017  | 0.142  |
|             |   | 3 | -0.032  | 0.024 | 0.438 | -0.095 | 0.032  |
|             | 3 | 1 | 0.111*  | 0.018 | 0.000 | 0.063  | 0.160  |
|             |   | 2 | 0.032   | 0.024 | 0.438 | -0.032 | 0.095  |
| SAVIImax    | 1 | 2 | -0.154* | 0.033 | 0.001 | -0.240 | -0.068 |
|             |   | 3 | -0.153* | 0.025 | 0.000 | -0.220 | -0.086 |
|             | 2 | 1 | 0.154*  | 0.033 | 0.001 | 0.068  | 0.240  |
|             |   | 3 | 0.001   | 0.033 | 0.999 | -0.086 | 0.089  |
|             | 3 | 1 | 0.153*  | 0.025 | 0.000 | 0.086  | 0.220  |
|             |   | 2 | -0.001  | 0.033 | 0.999 | -0.089 | 0.086  |
| SAVIImIn    | 1 | 2 | -0.176* | 0.034 | 0.000 | -0.265 | -0.087 |
|             |   | 3 | -0.153* | 0.026 | 0.000 | -0.222 | -0.084 |
|             | 2 | 1 | 0.176*  | 0.034 | 0.000 | 0.087  | 0.265  |
|             |   | 3 | 0.023   | 0.034 | 0.791 | -0.067 | 0.113  |
|             | 3 | 1 | 0.153*  | 0.026 | 0.000 | 0.084  | 0.222  |
|             |   | 2 | -0.023  | 0.034 | 0.791 | -0.113 | 0.067  |
| SAVIav      | 1 | 2 | -0.165* | 0.032 | 0.000 | -0.249 | -0.080 |
|             |   | 3 | -0.151* | 0.025 | 0.000 | -0.217 | -0.086 |
|             | 2 | 1 | 0.165*  | 0.032 | 0.000 | 0.080  | 0.249  |
|             |   | 3 | 0.013   | 0.032 | 0.919 | -0.072 | 0.099  |
|             | 3 | 1 | 0.151*  | 0.025 | 0.000 | 0.086  | 0.217  |
|             |   | 2 | -0.013  | 0.032 | 0.919 | -0.099 | 0.072  |
| SAVIImaxmin | 1 | 2 | -0.164* | 0.031 | 0.000 | -0.246 | -0.081 |
|             |   | 3 | -0.142* | 0.024 | 0.000 | -0.206 | -0.078 |
|             | 2 | 1 | 0.164*  | 0.031 | 0.000 | 0.081  | 0.246  |
|             |   | 3 | 0.022   | 0.032 | 0.797 | -0.063 | 0.106  |
|             | 3 | 1 | 0.142*  | 0.024 | 0.000 | 0.078  | 0.206  |
|             |   | 2 | -0.022  | 0.032 | 0.797 | -0.106 | 0.063  |
| SAVIImInmax | 1 | 2 | -0.166* | 0.035 | 0.000 | -0.258 | -0.074 |
|             |   | 3 | -0.164* | 0.027 | 0.000 | -0.235 | -0.092 |
|             | 2 | 1 | 0.166*  | 0.035 | 0.000 | 0.074  | 0.258  |
|             |   | 3 | 0.003   | 0.035 | 0.997 | -0.091 | 0.096  |
|             | 3 | 1 | 0.164*  | 0.027 | 0.000 | 0.092  | 0.235  |
|             |   | 2 | -0.003  | 0.035 | 0.997 | -0.096 | 0.091  |
| SAVIavmax   | 1 | 2 | -0.160* | 0.034 | 0.001 | -0.251 | -0.070 |
|             |   | 3 | -0.161* | 0.027 | 0.000 | -0.231 | -0.091 |
|             | 2 | 1 | 0.160*  | 0.034 | 0.001 | 0.070  | 0.251  |
|             |   | 3 | -0.001  | 0.035 | 1.000 | -0.093 | 0.092  |
|             | 3 | 1 | 0.161*  | 0.027 | 0.000 | 0.091  | 0.231  |
|             |   | 2 | 0.001   | 0.035 | 1.000 | -0.092 | 0.093  |
| SAVIavmin   | 1 | 2 | -0.170* | 0.033 | 0.000 | -0.257 | -0.083 |
|             |   | 3 | -0.150* | 0.026 | 0.000 | -0.218 | -0.083 |
|             | 2 | 1 | 0.170*  | 0.033 | 0.000 | 0.083  | 0.257  |
|             |   | 3 | 0.020   | 0.033 | 0.837 | -0.068 | 0.108  |
|             | 3 | 1 | 0.150*  | 0.026 | 0.000 | 0.083  | 0.218  |
|             |   | 2 | -0.020  | 0.033 | 0.837 | -0.108 | 0.068  |

|           |   |   |         |       |       |        |        |
|-----------|---|---|---------|-------|-------|--------|--------|
| SAVImaxav | 1 | 2 | -0.158* | 0.030 | 0.000 | -0.238 | -0.078 |
|           |   | 3 | -0.143* | 0.024 | 0.000 | -0.205 | -0.081 |
|           | 2 | 1 | 0.158*  | 0.030 | 0.000 | 0.078  | 0.238  |
|           |   | 3 | 0.015   | 0.031 | 0.889 | -0.067 | 0.096  |
|           | 3 | 1 | 0.143*  | 0.024 | 0.000 | 0.081  | 0.205  |
|           |   | 2 | -0.015  | 0.031 | 0.889 | -0.096 | 0.067  |
| SAVIminav | 1 | 2 | -0.170* | 0.033 | 0.000 | -0.256 | -0.085 |
|           |   | 3 | -0.154* | 0.025 | 0.000 | -0.221 | -0.087 |
|           | 2 | 1 | 0.170*  | 0.033 | 0.000 | 0.085  | 0.256  |
|           |   | 3 | 0.017   | 0.033 | 0.882 | -0.071 | 0.104  |
|           | 3 | 1 | 0.154*  | 0.025 | 0.000 | 0.087  | 0.221  |
|           |   | 2 | -0.017  | 0.033 | 0.882 | -0.104 | 0.071  |
| SAVIedmax | 1 | 2 | -0.073* | 0.022 | 0.013 | -0.132 | -0.015 |
|           |   | 3 | -0.103* | 0.017 | 0.000 | -0.148 | -0.058 |
|           | 2 | 1 | 0.073*  | 0.022 | 0.013 | 0.015  | 0.132  |
|           |   | 3 | -0.030  | 0.022 | 0.431 | -0.089 | 0.030  |
|           | 3 | 1 | 0.103*  | 0.017 | 0.000 | 0.058  | 0.148  |
|           |   | 2 | 0.030   | 0.022 | 0.431 | -0.030 | 0.089  |
| SAVIedmin | 1 | 2 | -0.082* | 0.023 | 0.006 | -0.142 | -0.022 |
|           |   | 3 | -0.111* | 0.018 | 0.000 | -0.157 | -0.064 |
|           | 2 | 1 | 0.082*  | 0.023 | 0.006 | 0.022  | 0.142  |
|           |   | 3 | -0.029  | 0.023 | 0.472 | -0.090 | 0.032  |
|           | 3 | 1 | 0.111*  | 0.018 | 0.000 | 0.064  | 0.157  |
|           |   | 2 | 0.029   | 0.023 | 0.472 | -0.032 | 0.090  |
| SAVIedav  | 1 | 2 | -0.078* | 0.023 | 0.011 | -0.140 | -0.017 |
|           |   | 3 | -0.110* | 0.018 | 0.000 | -0.158 | -0.062 |
|           | 2 | 1 | .0783*  | 0.023 | 0.011 | 0.017  | 0.140  |
|           |   | 3 | -0.032  | 0.024 | 0.420 | -0.094 | 0.031  |
|           | 3 | 1 | 0.110*  | 0.018 | 0.000 | 0.062  | 0.158  |
|           |   | 2 | 0.032   | 0.024 | 0.420 | -0.031 | 0.094  |

\*The mean difference is significant at the 0.05 level.

<sup>1</sup> Soil types are given as following: 1 – grey forest soil, 2 – alluvial soil, 3 – chernozem.

**Table S11.** Average values of soil reflectance in red part of spectrum and vegetation indices (presented data on soil was used to create **Figure 8** of original manuscript)

| Soil type <sup>1</sup> | Stage of winter wheat development | RED  | NDVI | EVI2 | SAVI |
|------------------------|-----------------------------------|------|------|------|------|
| 1                      | tillering                         | 0.16 | 0.21 | 0.13 | 0.14 |
| 1                      | tillering                         | 0.06 | 0.19 | 0.06 | 0.06 |
| 1                      | tillering                         | 0.10 | 0.23 | 0.11 | 0.12 |
| 1                      | tillering                         | 0.12 | 0.22 | 0.12 | 0.13 |
| 1                      | tillering                         | 0.18 | 0.18 | 0.11 | 0.12 |
| 1                      | tillering                         | 0.16 | 0.19 | 0.11 | 0.12 |
| 1                      | tillering                         | 0.12 | 0.28 | 0.15 | 0.16 |
| 1                      | tillering                         | 0.19 | 0.19 | 0.13 | 0.14 |
| 1                      | tillering                         | 0.17 | 0.20 | 0.12 | 0.13 |
| 1                      | tillering                         | 0.25 | 0.15 | 0.11 | 0.12 |
| 1                      | tillering                         | 0.12 | 0.23 | 0.12 | 0.13 |
| 1                      | tillering                         | 0.09 | 0.21 | 0.09 | 0.10 |
| 1                      | tillering                         | 0.09 | 0.27 | 0.13 | 0.14 |
| 1                      | tillering                         | 0.25 | 0.14 | 0.11 | 0.12 |
| 2                      | tillering                         | 0.08 | 0.16 | 0.06 | 0.06 |
| 2                      | tillering                         | 0.09 | 0.19 | 0.08 | 0.09 |
| 2                      | tillering                         | 0.11 | 0.19 | 0.09 | 0.10 |
| 2                      | tillering                         | 0.07 | 0.25 | 0.10 | 0.11 |
| 2                      | tillering                         | 0.11 | 0.26 | 0.14 | 0.15 |
| 2                      | tillering                         | 0.06 | 0.25 | 0.08 | 0.09 |
| 2                      | tillering                         | 0.03 | 0.27 | 0.05 | 0.06 |
| 2                      | tillering                         | 0.07 | 0.19 | 0.06 | 0.07 |
| 3                      | tillering                         | 0.04 | 0.22 | 0.04 | 0.04 |
| 3                      | tillering                         | 0.07 | 0.24 | 0.06 | 0.07 |
| 3                      | tillering                         | 0.04 | 0.21 | 0.03 | 0.04 |
| 3                      | tillering                         | 0.05 | 0.29 | 0.06 | 0.07 |
| 3                      | tillering                         | 0.05 | 0.23 | 0.05 | 0.05 |
| 3                      | tillering                         | 0.04 | 0.23 | 0.04 | 0.04 |
| 3                      | tillering                         | 0.05 | 0.23 | 0.04 | 0.05 |
| 3                      | tillering                         | 0.04 | 0.24 | 0.04 | 0.05 |
| 3                      | tillering                         | 0.04 | 0.22 | 0.04 | 0.04 |
| 3                      | tillering                         | 0.05 | 0.24 | 0.05 | 0.06 |
| 3                      | tillering                         | 0.07 | 0.27 | 0.07 | 0.08 |
| 3                      | tillering                         | 0.04 | 0.23 | 0.04 | 0.04 |
| 1                      | shooting                          | 0.11 | 0.25 | 0.13 | 0.14 |
| 1                      | shooting                          | 0.10 | 0.35 | 0.18 | 0.20 |
| 1                      | shooting                          | 0.19 | 0.21 | 0.15 | 0.16 |
| 1                      | shooting                          | 0.08 | 0.32 | 0.14 | 0.15 |
| 1                      | shooting                          | 0.14 | 0.37 | 0.25 | 0.26 |
| 1                      | shooting                          | 0.12 | 0.38 | 0.24 | 0.25 |
| 1                      | shooting                          | 0.14 | 0.20 | 0.11 | 0.12 |
| 1                      | shooting                          | 0.11 | 0.30 | 0.17 | 0.18 |
| 1                      | shooting                          | 0.17 | 0.27 | 0.18 | 0.19 |



|   |                |      |      |      |      |
|---|----------------|------|------|------|------|
| 1 | shooting       | 0.08 | 0.41 | 0.20 | 0.21 |
| 2 | shooting       | 0.07 | 0.22 | 0.07 | 0.08 |
| 2 | shooting       | 0.04 | 0.22 | 0.05 | 0.06 |
| 2 | shooting       | 0.07 | 0.38 | 0.16 | 0.17 |
| 2 | shooting       | 0.13 | 0.27 | 0.15 | 0.17 |
| 2 | shooting       | 0.07 | 0.39 | 0.18 | 0.19 |
| 3 | shooting       | 0.05 | 0.25 | 0.07 | 0.08 |
| 3 | shooting       | 0.07 | 0.22 | 0.07 | 0.08 |
| 3 | shooting       | 0.09 | 0.19 | 0.09 | 0.10 |
| 3 | shooting       | 0.10 | 0.23 | 0.09 | 0.10 |
| 3 | shooting       | 0.09 | 0.23 | 0.07 | 0.07 |
| 3 | shooting       | 0.09 | 0.21 | 0.08 | 0.09 |
| 3 | shooting       | 0.07 | 0.20 | 0.07 | 0.08 |
| 3 | shooting       | 0.10 | 0.19 | 0.08 | 0.09 |
| 3 | shooting       | 0.09 | 0.17 | 0.09 | 0.10 |
| 3 | shooting       | 0.06 | 0.20 | 0.07 | 0.08 |
| 3 | shooting       | 0.08 | 0.21 | 0.07 | 0.08 |
| 3 | shooting       | 0.07 | 0.19 | 0.08 | 0.09 |
| 3 | shooting       | 0.08 | 0.22 | 0.09 | 0.10 |
| 1 | milky ripeness | 0.07 | 0.32 | 0.12 | 0.14 |
| 1 | milky ripeness | 0.11 | 0.31 | 0.17 | 0.18 |
| 1 | milky ripeness | 0.08 | 0.46 | 0.23 | 0.25 |
| 1 | milky ripeness | 0.08 | 0.35 | 0.16 | 0.18 |
| 1 | milky ripeness | 0.11 | 0.27 | 0.15 | 0.16 |
| 1 | milky ripeness | 0.07 | 0.35 | 0.15 | 0.16 |
| 1 | milky ripeness | 0.10 | 0.29 | 0.14 | 0.16 |
| 1 | milky ripeness | 0.19 | 0.22 | 0.15 | 0.16 |
| 1 | milky ripeness | 0.06 | 0.42 | 0.18 | 0.19 |
| 1 | milky ripeness | 0.12 | 0.35 | 0.20 | 0.22 |
| 2 | milky ripeness | 0.03 | 0.31 | 0.07 | 0.08 |
| 2 | milky ripeness | 0.17 | 0.35 | 0.26 | 0.27 |
| 2 | milky ripeness | 0.07 | 0.40 | 0.17 | 0.18 |
| 2 | milky ripeness | 0.04 | 0.44 | 0.13 | 0.14 |
| 3 | milky ripeness | 0.07 | 0.27 | 0.10 | 0.11 |
| 3 | milky ripeness | 0.08 | 0.22 | 0.08 | 0.09 |
| 3 | milky ripeness | 0.07 | 0.31 | 0.12 | 0.13 |
| 3 | milky ripeness | 0.06 | 0.25 | 0.09 | 0.10 |
| 3 | milky ripeness | 0.07 | 0.24 | 0.08 | 0.09 |
| 3 | milky ripeness | 0.08 | 0.24 | 0.09 | 0.10 |
| 3 | milky ripeness | 0.09 | 0.23 | 0.10 | 0.11 |
| 3 | milky ripeness | 0.08 | 0.24 | 0.09 | 0.10 |
| 3 | milky ripeness | 0.09 | 0.24 | 0.10 | 0.11 |

---

<sup>1</sup> Soil types are given as following: 1 – grey forest soil, 2 – alluvial soil, 3 – chernozem.
