# Supplementary material
Source: MDPI journal article supplement (https://www.mdpi.com/2072-4292/11/16/1932)
Supplement: s1 [file s1]

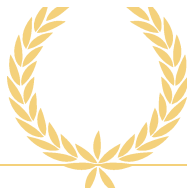

We certify that the following article

## Influence of soil background on spectral reflectance of winter wheat crop canopy

Elena Prudnikova

has undergone English language editing by MDPI. The text has been checked for correct use of grammar and common technical terms, and edited to a level suitable for reporting research in a scholarly journal.

MDPI uses experienced, native English speaking editors. Full details of the editing service can be found at

► <https://www.mdpi.com/authors/english>.

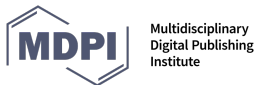

Basel, June 2019

Martyn Rittman, Ph.D.  
English Editing Manager  
[englishediting@mdpi.com](mailto:englishediting@mdpi.com)  
<https://www.mdpi.com/authors/english>
